# Supplementary material for: MeCP2 regulates Gdf11, a dosage-sensitive gene critical for neurological function
Source: eLife. 2023 Feb 27;12:e83806. doi: 10.7554/eLife.83806 (PMC9977283; doi:10.7554/eLife.83806)
Supplement: Figure 2—source data 1. [file elife-83806-fig2-data1.xlsx]

## Sheet: Elevated Plus Maze
Mouse ID	Genotype	Sex		Total distance (cm)	Line crossings	Open arm entries
Mouse-MECP2TG-Interaction-cohort-1	Wild-type	Male		13.728	77	17
Mouse-MECP2TG-Interaction-cohort-2	Wild-type	Male		12.998	79	17
Mouse-MECP2TG-Interaction-cohort-3	Wild-type	Male		23.975	127	25
Mouse-MECP2TG-Interaction-cohort-4	Wild-type	Male		15.045	77	9
Mouse-MECP2TG-Interaction-cohort-5	Wild-type	Male		19.333	115	15
Mouse-MECP2TG-Interaction-cohort-6	Wild-type	Male		12.363	85	14
Mouse-MECP2TG-Interaction-cohort-7	Wild-type	Male		21.608	135	22
Mouse-MECP2TG-Interaction-cohort-8	Wild-type	Male		18.863	113	17
Mouse-MECP2TG-Interaction-cohort-9	Wild-type	Male		15.089	91	18
Mouse-MECP2TG-Interaction-cohort-10	Wild-type	Male		14.32	77	22
Mouse-MECP2TG-Interaction-cohort-11	Wild-type	Male		18.195	113	15
Mouse-MECP2TG-Interaction-cohort-12	Wild-type	Male		17.451	105	20
Mouse-MECP2TG-Interaction-cohort-13	Wild-type	Male		12.055	71	12
Mouse-MECP2TG-Interaction-cohort-14	Wild-type	Male		18.599	103	11
Mouse-MECP2TG-Interaction-cohort-15	Wild-type	Male		18.143	115	20
Mouse-MECP2TG-Interaction-cohort-16	Wild-type	Male		12.538	93	11
Mouse-MECP2TG-Interaction-cohort-17	Wild-type	Male		14.615	93	13
Mouse-MECP2TG-Interaction-cohort-18	Wild-type	Male		13.955	85	16
Mouse-MECP2TG-Interaction-cohort-19	Wild-type	Male		20.552	109	14
Mouse-MECP2TG-Interaction-cohort-20	Wild-type	Female		16.168	115	11
Mouse-MECP2TG-Interaction-cohort-21	Wild-type	Female		18.116	107	19
Mouse-MECP2TG-Interaction-cohort-22	Wild-type	Female		13.648	85	15
Mouse-MECP2TG-Interaction-cohort-23	Wild-type	Female		20.468	133	22
Mouse-MECP2TG-Interaction-cohort-24	Wild-type	Female		14.003	77	13
Mouse-MECP2TG-Interaction-cohort-25	Wild-type	Female		14.693	91	13
Mouse-MECP2TG-Interaction-cohort-26	Wild-type	Female		18.707	113	20
Mouse-MECP2TG-Interaction-cohort-27	Wild-type	Female		19.953	117	25
Mouse-MECP2TG-Interaction-cohort-28	Wild-type	Female		19.478	109	17
Mouse-MECP2TG-Interaction-cohort-29	Wild-type	Female		16.885	102	16
Mouse-MECP2TG-Interaction-cohort-30	Wild-type	Female		10.582	79	7
Mouse-MECP2TG-Interaction-cohort-31	MECP2-TG1	Male		10.242	64	13
Mouse-MECP2TG-Interaction-cohort-32	MECP2-TG1	Male		5.606	95	10
Mouse-MECP2TG-Interaction-cohort-33	MECP2-TG1	Male		9.916	61	9
Mouse-MECP2TG-Interaction-cohort-34	MECP2-TG1	Male		11.784	70	5
Mouse-MECP2TG-Interaction-cohort-35	MECP2-TG1	Male		11.23	63	11
Mouse-MECP2TG-Interaction-cohort-36	MECP2-TG1	Male		11.829	71	10
Mouse-MECP2TG-Interaction-cohort-37	MECP2-TG1	Male		15.887	79	11
Mouse-MECP2TG-Interaction-cohort-38	MECP2-TG1	Male		6.559	59	7
Mouse-MECP2TG-Interaction-cohort-39	MECP2-TG1	Male		7.61	49	10
Mouse-MECP2TG-Interaction-cohort-40	MECP2-TG1	Male		3.666	39	6
Mouse-MECP2TG-Interaction-cohort-41	MECP2-TG1	Male		3.132	40	4
Mouse-MECP2TG-Interaction-cohort-42	MECP2-TG1	Male		12.039	89	10
Mouse-MECP2TG-Interaction-cohort-43	MECP2-TG1	Male		10.86	65	11
Mouse-MECP2TG-Interaction-cohort-44	MECP2-TG1	Male		12.097	85	15
Mouse-MECP2TG-Interaction-cohort-45	MECP2-TG1	Female		14.27	96	7
Mouse-MECP2TG-Interaction-cohort-46	MECP2-TG1	Female		10.292	67	5
Mouse-MECP2TG-Interaction-cohort-47	MECP2-TG1	Female		15.132	107	17
Mouse-MECP2TG-Interaction-cohort-48	MECP2-TG1	Female		9.465	57	10
Mouse-MECP2TG-Interaction-cohort-49	MECP2-TG1	Female		3.024	45	4
Mouse-MECP2TG-Interaction-cohort-50	MECP2-TG1	Female		13.967	92	15
Mouse-MECP2TG-Interaction-cohort-51	MECP2-TG1	Female		2.723	55	2
Mouse-MECP2TG-Interaction-cohort-52	MECP2-TG1	Female		14.077	89	19
Mouse-MECP2TG-Interaction-cohort-53	MECP2-TG1	Female		9.413	75	11
Mouse-MECP2TG-Interaction-cohort-54	MECP2-TG1	Female		10.19	80	8
Mouse-MECP2TG-Interaction-cohort-55	MECP2-TG1	Female		16.353	115	17
Mouse-MECP2TG-Interaction-cohort-56	MECP2-TG1	Female		9.738	74	15
Mouse-MECP2TG-Interaction-cohort-57	MECP2-TG1; Gdf11 tm2b/+	Male		16.914	105	25
Mouse-MECP2TG-Interaction-cohort-58	MECP2-TG1; Gdf11 tm2b/+	Male		22.211	125	35
Mouse-MECP2TG-Interaction-cohort-59	MECP2-TG1; Gdf11 tm2b/+	Male		14.615	87	18
Mouse-MECP2TG-Interaction-cohort-60	MECP2-TG1; Gdf11 tm2b/+	Male		15.247	102	14
Mouse-MECP2TG-Interaction-cohort-61	MECP2-TG1; Gdf11 tm2b/+	Male		15.778	108	12
Mouse-MECP2TG-Interaction-cohort-62	MECP2-TG1; Gdf11 tm2b/+	Male		13.142	81	16
Mouse-MECP2TG-Interaction-cohort-63	MECP2-TG1; Gdf11 tm2b/+	Male		11.303	79	14
Mouse-MECP2TG-Interaction-cohort-64	MECP2-TG1; Gdf11 tm2b/+	Male		11.026	85	7
Mouse-MECP2TG-Interaction-cohort-65	MECP2-TG1; Gdf11 tm2b/+	Male		11.342	89	11
Mouse-MECP2TG-Interaction-cohort-66	MECP2-TG1; Gdf11 tm2b/+	Male		11.694	89	9
Mouse-MECP2TG-Interaction-cohort-67	MECP2-TG1; Gdf11 tm2b/+	Male		8.944	65	1
Mouse-MECP2TG-Interaction-cohort-68	MECP2-TG1; Gdf11 tm2b/+	Male		14.087	99	11
Mouse-MECP2TG-Interaction-cohort-69	MECP2-TG1; Gdf11 tm2b/+	Male		13.091	73	15
Mouse-MECP2TG-Interaction-cohort-70	MECP2-TG1; Gdf11 tm2b/+	Male		16.353	116	23
Mouse-MECP2TG-Interaction-cohort-71	MECP2-TG1; Gdf11 tm2b/+	Male		12.399	77	9
Mouse-MECP2TG-Interaction-cohort-72	MECP2-TG1; Gdf11 tm2b/+	Male		13.32	92	16
Mouse-MECP2TG-Interaction-cohort-73	MECP2-TG1; Gdf11 tm2b/+	Female		14.794	93	18
Mouse-MECP2TG-Interaction-cohort-74	MECP2-TG1; Gdf11 tm2b/+	Female		12.615	75	11
Mouse-MECP2TG-Interaction-cohort-75	MECP2-TG1; Gdf11 tm2b/+	Female		16.514	141	16
Mouse-MECP2TG-Interaction-cohort-76	MECP2-TG1; Gdf11 tm2b/+	Female		15.352	91	15
Mouse-MECP2TG-Interaction-cohort-77	MECP2-TG1; Gdf11 tm2b/+	Female		13.094	78	13
Mouse-MECP2TG-Interaction-cohort-78	MECP2-TG1; Gdf11 tm2b/+	Female		8.818	79	11
		Statistics
		test		Brown-Forsythe and Welsch ANOVA tests	Brown-Forsythe and Welsch ANOVA tests	Brown-Forsythe and Welsch ANOVA tests
		p-value		<0.0001	<0.0001	0.004
				Dunnett's multiple comparisons	Dunnett's multiple comparisons	Dunnett's multiple comparisons
		p-adjusted	WT v. TG1	<0.0001	<0.0001	<0.0001
			WT v. TG1; tm2b/+	0.0071	0.3821	0.6952
			TG1 v. TG1; tm2b/+	0.0017	0.0022	0.0376

## Sheet: Open Field
Mouse ID	Genotype	Sex		Total Distance (cm)	Horizontal Activity Count	Vertical Activity Count	Duration (Centroid)	Entry Count (Centroid)	Total Distance (Centroid)	Distance ratio (center / total)	Time in center ratio (center/ total)
Mouse-MECP2TG-Interaction-cohort-1	Wild-type	Male		3812.69	7273	211	250.42	173	1034.53	0.271339	0.139122
Mouse-MECP2TG-Interaction-cohort-2	Wild-type	Male		4110.49	9840	344	570.24	314	1888.29	0.459383	0.3168
Mouse-MECP2TG-Interaction-cohort-3	Wild-type	Male		4550.46	9958	398	391.78	210	1190.88	0.261705	0.217656
Mouse-MECP2TG-Interaction-cohort-4	Wild-type	Male		4701.78	9274	319	399.14	216	1398.63	0.297468	0.221744
Mouse-MECP2TG-Interaction-cohort-5	Wild-type	Male		4806.07	8413	116	347.03	173	1367.67	0.284571	0.192794
Mouse-MECP2TG-Interaction-cohort-6	Wild-type	Male		3691.81	6447	331	145.5	136	903.48	0.244725	0.0808333
Mouse-MECP2TG-Interaction-cohort-7	Wild-type	Male		6116.98	9449	290	421.93	196	1558.23	0.254738	0.234406
Mouse-MECP2TG-Interaction-cohort-8	Wild-type	Male		4297.31	7902	416	268.21	189	1210.16	0.281609	0.149006
Mouse-MECP2TG-Interaction-cohort-9	Wild-type	Male		2895.1	7118	153	259.65	156	833.6	0.287935	0.14425
Mouse-MECP2TG-Interaction-cohort-10	Wild-type	Male		3190.58	7550	271	345.7	189	990.04	0.310301	0.192056
Mouse-MECP2TG-Interaction-cohort-11	Wild-type	Male		3407.05	9502	335	363.54	194	949.64	0.278728	0.201967
Mouse-MECP2TG-Interaction-cohort-12	Wild-type	Male		5217.61	8543	586	613.25	353	1936.7	0.371185	0.340694
Mouse-MECP2TG-Interaction-cohort-13	Wild-type	Male		3232.22	9493	212	329.99	247	987.79	0.305607	0.183328
Mouse-MECP2TG-Interaction-cohort-14	Wild-type	Male		5997.79	9838	795	763.22	305	2709.63	0.451771	0.424011
Mouse-MECP2TG-Interaction-cohort-15	Wild-type	Male		3261.56	6618	409	540.75	208	1376.18	0.421939	0.300417
Mouse-MECP2TG-Interaction-cohort-16	Wild-type	Male		2605.81	6247	154	392.86	156	752.14	0.28864	0.218256
Mouse-MECP2TG-Interaction-cohort-17	Wild-type	Male		3405.12	6735	263	421.06	135	719.51	0.211302	0.233922
Mouse-MECP2TG-Interaction-cohort-18	Wild-type	Male		2523.06	5777	298	514.69	181	811	0.321435	0.285939
Mouse-MECP2TG-Interaction-cohort-19	Wild-type	Male		3623.58	6767	449	286.07	182	1180.16	0.325689	0.158928
Mouse-MECP2TG-Interaction-cohort-20	Wild-type	Female		5814.69	10747	241	579.95	223	2073.27	0.356557	0.322194
Mouse-MECP2TG-Interaction-cohort-21	Wild-type	Female		3001.95	6799	165	265.26	160	919.65	0.306351	0.147367
Mouse-MECP2TG-Interaction-cohort-22	Wild-type	Female		2224.52	4486	144	232.16	105	523.56	0.235359	0.128978
Mouse-MECP2TG-Interaction-cohort-23	Wild-type	Female		5035.5	10353	412	519.36	297	2037.09	0.404546	0.288533
Mouse-MECP2TG-Interaction-cohort-24	Wild-type	Female		3180.45	7938	142	289.7	207	891.12	0.280187	0.160944
Mouse-MECP2TG-Interaction-cohort-25	Wild-type	Female		3498.76	11828	147	433.62	301	1247.27	0.356489	0.2409
Mouse-MECP2TG-Interaction-cohort-26	Wild-type	Female		3624.46	8151	402	688.02	237	1558.23	0.429921	0.382233
Mouse-MECP2TG-Interaction-cohort-27	Wild-type	Female		2997.27	6159	232	533.96	178	822.29	0.274346	0.296644
Mouse-MECP2TG-Interaction-cohort-28	Wild-type	Female		3145.47	6230	220	417.59	213	1145.08	0.364041	0.231994
Mouse-MECP2TG-Interaction-cohort-29	Wild-type	Female		3858.3	7887	270	630.64	282	1493.78	0.38716	0.350356
Mouse-MECP2TG-Interaction-cohort-30	Wild-type	Female		2592.87	7157	164	567.33	177	858.65	0.331158	0.315183
Mouse-MECP2TG-Interaction-cohort-31	MECP2-TG1	Male		6152.27	8936	408	590.34	227	2161.72	0.351369	0.327967
Mouse-MECP2TG-Interaction-cohort-32	MECP2-TG1	Male		2174.21	4450	184	311.21	126	764.5	0.351622	0.172894
Mouse-MECP2TG-Interaction-cohort-33	MECP2-TG1	Male		2544.12	4987	102	374.02	112	824.41	0.324045	0.207789
Mouse-MECP2TG-Interaction-cohort-34	MECP2-TG1	Male		2621.11	4483	74	437.05	119	725.54	0.276806	0.242806
Mouse-MECP2TG-Interaction-cohort-35	MECP2-TG1	Male		1850.73	6177	125	179.59	122	362.06	0.195631	0.0997722
Mouse-MECP2TG-Interaction-cohort-36	MECP2-TG1	Male		3815.99	6048	151	280.15	121	1029.28	0.269728	0.155639
Mouse-MECP2TG-Interaction-cohort-37	MECP2-TG1	Male		3638.86	6366	173	511.54	198	1243.4	0.3417	0.284189
Mouse-MECP2TG-Interaction-cohort-38	MECP2-TG1	Male		1693.26	3654	63	210.36	80	317.58	0.187555	0.116867
Mouse-MECP2TG-Interaction-cohort-39	MECP2-TG1	Male		2020.56	3248	50	321.92	86	609.47	0.301634	0.178844
Mouse-MECP2TG-Interaction-cohort-40	MECP2-TG1	Male		2840.04	6033	132	395.6	153	871.97	0.307027	0.219778
Mouse-MECP2TG-Interaction-cohort-41	MECP2-TG1	Male		1907.4	5460	32	1075.43	226	1072.81	0.562446	0.597461
Mouse-MECP2TG-Interaction-cohort-42	MECP2-TG1	Male		2011.72	6485	87	342.62	141	576.21	0.286427	0.190344
Mouse-MECP2TG-Interaction-cohort-43	MECP2-TG1	Male		2801.84	5965	98	490.29	149	914.91	0.326539	0.272383
Mouse-MECP2TG-Interaction-cohort-44	MECP2-TG1	Male		2577.3	8543	139	711.7	321	954.05	0.370174	0.395389
Mouse-MECP2TG-Interaction-cohort-45	MECP2-TG1	Female		3106.29	5537	77	405.1	115	1024.44	0.329795	0.225056
Mouse-MECP2TG-Interaction-cohort-46	MECP2-TG1	Female		2825.21	7525	93	666.62	187	919.18	0.325349	0.370344
Mouse-MECP2TG-Interaction-cohort-47	MECP2-TG1	Female		2907.4	4851	99	243.16	120	833.19	0.286576	0.135089
Mouse-MECP2TG-Interaction-cohort-48	MECP2-TG1	Female		1543.98	3133	95	203.02	73	417.28	0.270263	0.112789
Mouse-MECP2TG-Interaction-cohort-49	MECP2-TG1	Female		1532.61	3222	64	52.06	35	167.84	0.109513	0.0289222
Mouse-MECP2TG-Interaction-cohort-50	MECP2-TG1	Female		2302.42	4213	78	387.93	113	632.5	0.274711	0.215517
Mouse-MECP2TG-Interaction-cohort-51	MECP2-TG1	Female		2722.31	4702	110	179.03	129	676.46	0.248487	0.0994611
Mouse-MECP2TG-Interaction-cohort-52	MECP2-TG1	Female		3509.09	7063	121	524.71	197	1353.56	0.38573	0.291506
Mouse-MECP2TG-Interaction-cohort-53	MECP2-TG1	Female		1981.53	3998	81	179.31	93	290.88	0.146796	0.0996167
Mouse-MECP2TG-Interaction-cohort-54	MECP2-TG1	Female		2386.73	6350	129	246	140	590.42	0.247376	0.136667
Mouse-MECP2TG-Interaction-cohort-55	MECP2-TG1	Female		5081.47	10831	250	656.15	261	1909.74	0.375824	0.364528
Mouse-MECP2TG-Interaction-cohort-56	MECP2-TG1	Female		1060.6	2717	34	114.22	59	127.13	0.119866	0.0634556
Mouse-MECP2TG-Interaction-cohort-57	MECP2-TG1; Gdf11 tm2b/+	Male		2504.91	6154	140	572.19	180	959.72	0.383136	0.317883
Mouse-MECP2TG-Interaction-cohort-58	MECP2-TG1; Gdf11 tm2b/+	Male		6036.76	10115	211	423.94	216	1688.86	0.279763	0.235522
Mouse-MECP2TG-Interaction-cohort-59	MECP2-TG1; Gdf11 tm2b/+	Male		5942.36	11397	533	390.08	271	1764.58	0.296949	0.216711
Mouse-MECP2TG-Interaction-cohort-60	MECP2-TG1; Gdf11 tm2b/+	Male		3088.06	7206	255	528.7	147	1225.23	0.396764	0.293722
Mouse-MECP2TG-Interaction-cohort-61	MECP2-TG1; Gdf11 tm2b/+	Male		2880.25	6548	170	308.53	146	761.7	0.264456	0.171406
Mouse-MECP2TG-Interaction-cohort-62	MECP2-TG1; Gdf11 tm2b/+	Male		3335.29	5949	168	292.33	151	868.54	0.260409	0.162406
Mouse-MECP2TG-Interaction-cohort-63	MECP2-TG1; Gdf11 tm2b/+	Male		3626.38	7688	267	503.19	253	1331.32	0.367121	0.27955
Mouse-MECP2TG-Interaction-cohort-64	MECP2-TG1; Gdf11 tm2b/+	Male		3578.29	8440	198	675.9	207	1161.4	0.324568	0.3755
Mouse-MECP2TG-Interaction-cohort-65	MECP2-TG1; Gdf11 tm2b/+	Male		4293.9	8471	340	404.23	198	1509.52	0.35155	0.224572
Mouse-MECP2TG-Interaction-cohort-66	MECP2-TG1; Gdf11 tm2b/+	Male		3805.78	5799	119	308.02	113	930.87	0.244594	0.171122
Mouse-MECP2TG-Interaction-cohort-67	MECP2-TG1; Gdf11 tm2b/+	Male		3175.35	7742	177	425	161	1082.18	0.340807	0.236111
Mouse-MECP2TG-Interaction-cohort-68	MECP2-TG1; Gdf11 tm2b/+	Male		3685.76	7968	129	373.98	180	1073.52	0.291262	0.207767
Mouse-MECP2TG-Interaction-cohort-69	MECP2-TG1; Gdf11 tm2b/+	Male		1863.49	5463	117	302.47	150	552.68	0.296583	0.168039
Mouse-MECP2TG-Interaction-cohort-70	MECP2-TG1; Gdf11 tm2b/+	Male		3425.63	7372	227	567.54	179	1157.35	0.33785	0.3153
Mouse-MECP2TG-Interaction-cohort-71	MECP2-TG1; Gdf11 tm2b/+	Male		4126.14	11250	201	629.49	334	1469.38	0.356115	0.349717
Mouse-MECP2TG-Interaction-cohort-72	MECP2-TG1; Gdf11 tm2b/+	Male		3906.98	9048	259	740.16	297	1327.14	0.339684	0.4112
Mouse-MECP2TG-Interaction-cohort-73	MECP2-TG1; Gdf11 tm2b/+	Female		3818.61	8794	181	412.74	195	1210.34	0.316958	0.2293
Mouse-MECP2TG-Interaction-cohort-74	MECP2-TG1; Gdf11 tm2b/+	Female		2587.01	5045	90	188.71	107	538.48	0.208148	0.104839
Mouse-MECP2TG-Interaction-cohort-75	MECP2-TG1; Gdf11 tm2b/+	Female		3466.1	6792	162	296.53	140	1018.14	0.293742	0.164739
Mouse-MECP2TG-Interaction-cohort-76	MECP2-TG1; Gdf11 tm2b/+	Female		4271.42	8115	151	281.56	202	1065.07	0.249348	0.156422
Mouse-MECP2TG-Interaction-cohort-77	MECP2-TG1; Gdf11 tm2b/+	Female		2916.07	5300	124	370.93	123	843.85	0.289379	0.206072
Mouse-MECP2TG-Interaction-cohort-78	MECP2-TG1; Gdf11 tm2b/+	Female		3798.76	5810	141	534.65	176	1133.07	0.298274	0.297028
		Statistics
		test		Brown-Forsythe and Welsch ANOVA tests	Brown-Forsythe and Welsch ANOVA tests	Brown-Forsythe and Welsch ANOVA tests	Brown-Forsythe and Welsch ANOVA tests	Brown-Forsythe and Welsch ANOVA tests		Brown-Forsythe and Welsch ANOVA tests	Brown-Forsythe and Welsch ANOVA tests
		p-value		0.0003	<0.0001	<0.0001	0.6223	0.0004		0.283	0.6223
				Dunnett's multiple comparisons	Dunnett's multiple comparisons	Dunnett's multiple comparisons	Dunnett's multiple comparisons	Dunnett's multiple comparisons		Dunnett's multiple comparisons	Dunnett's multiple comparisons
		p-adjusted	WT v. TG1	0.0007	<0.0001	<0.0001	0.8459	0.0006		0.4219	0.8459
			WT v. TG1; tm2b/+	0.9033	0.7464	0.0163	0.9974	0.4535		0.7792	0.9974
			TG1 v. TG1; tm2b/+	0.0068	0.0019	0.0081	0.7846	0.0439		0.7966	0.7886

## Sheet: Light-Dark Box
Mouse ID	Genotype	Sex		Duration Dark	Horizontal activity dark	Total distance dark	Total distance light
Mouse-MECP2TG-Interaction-cohort-1	Wild-type	Male		433.67	948	286.48	316.43
Mouse-MECP2TG-Interaction-cohort-2	Wild-type	Male		284.56	1173	348	485.72
Mouse-MECP2TG-Interaction-cohort-3	Wild-type	Male		311.04	825	356.14	469.8
Mouse-MECP2TG-Interaction-cohort-4	Wild-type	Male		496.92	979	311.69	225.13
Mouse-MECP2TG-Interaction-cohort-5	Wild-type	Male		294.63	1283	842.38	704.36
Mouse-MECP2TG-Interaction-cohort-6	Wild-type	Male		473.7	1929	735.41	530.29
Mouse-MECP2TG-Interaction-cohort-7	Wild-type	Male		264	1286	471.33	631.97
Mouse-MECP2TG-Interaction-cohort-8	Wild-type	Male		378.59	1635	768.82	588.25
Mouse-MECP2TG-Interaction-cohort-9	Wild-type	Male		329.64	1102	366.62	385.55
Mouse-MECP2TG-Interaction-cohort-10	Wild-type	Male		294.78	1278	336.41	375.26
Mouse-MECP2TG-Interaction-cohort-11	Wild-type	Male		393.65	1269	686.85	437.4
Mouse-MECP2TG-Interaction-cohort-12	Wild-type	Male		419.44	1649	467.4	369.67
Mouse-MECP2TG-Interaction-cohort-13	Wild-type	Male		427.5	1827	414.49	389.46
Mouse-MECP2TG-Interaction-cohort-14	Wild-type	Male		252.21	1922	759.47	1014.02
Mouse-MECP2TG-Interaction-cohort-15	Wild-type	Male		329.34	1586	479.21	438.33
Mouse-MECP2TG-Interaction-cohort-16	Wild-type	Male		390.86	1209	485.31	422.44
Mouse-MECP2TG-Interaction-cohort-17	Wild-type	Male		428.93	972	291.91	172.43
Mouse-MECP2TG-Interaction-cohort-18	Wild-type	Male		403.25	936	347.03	262.31
Mouse-MECP2TG-Interaction-cohort-19	Wild-type	Male		487.59	1882	452.63	321.71
Mouse-MECP2TG-Interaction-cohort-20	Wild-type	Female		413.06	1837	617.57	579.68
Mouse-MECP2TG-Interaction-cohort-21	Wild-type	Female		310.88	1352	321.13	315.88
Mouse-MECP2TG-Interaction-cohort-22	Wild-type	Female		485	2065	481.98	330.31
Mouse-MECP2TG-Interaction-cohort-23	Wild-type	Female		240.12	1638	534.33	761.16
Mouse-MECP2TG-Interaction-cohort-24	Wild-type	Female		502.36	1488	501.59	216.85
Mouse-MECP2TG-Interaction-cohort-25	Wild-type	Female		311.87	2450	607.89	544.38
Mouse-MECP2TG-Interaction-cohort-26	Wild-type	Female		354.17	1667	399.53	417.89
Mouse-MECP2TG-Interaction-cohort-27	Wild-type	Female		240.14	1361	367.96	421.76
Mouse-MECP2TG-Interaction-cohort-28	Wild-type	Female		287.5	900	443.68	435.94
Mouse-MECP2TG-Interaction-cohort-29	Wild-type	Female		456.67	1736	479.01	273.43
Mouse-MECP2TG-Interaction-cohort-30	Wild-type	Female		493.5	1633	378.34	149.23
Mouse-MECP2TG-Interaction-cohort-31	MECP2-TG1	Male		246.91	1438	298.99	395.84
Mouse-MECP2TG-Interaction-cohort-32	MECP2-TG1	Male		263.56	1022	407.43	564.9
Mouse-MECP2TG-Interaction-cohort-33	MECP2-TG1	Male		539.78	716	321.18	115.47
Mouse-MECP2TG-Interaction-cohort-34	MECP2-TG1	Male		487.32	1138	479.98	216.56
Mouse-MECP2TG-Interaction-cohort-35	MECP2-TG1	Male		449.56	1094	165.45	207.59
Mouse-MECP2TG-Interaction-cohort-36	MECP2-TG1	Male		463.36	694	229.46	184.61
Mouse-MECP2TG-Interaction-cohort-37	MECP2-TG1	Male		447.18	1357	463.04	326.27
Mouse-MECP2TG-Interaction-cohort-38	MECP2-TG1	Male		542.09	1315	320.08	59.44
Mouse-MECP2TG-Interaction-cohort-39	MECP2-TG1	Male		544.79	878	419.11	158.9
Mouse-MECP2TG-Interaction-cohort-40	MECP2-TG1	Male		503.34	1344	386.89	128.21
Mouse-MECP2TG-Interaction-cohort-41	MECP2-TG1	Male		536.46	681	159.38	78.22
Mouse-MECP2TG-Interaction-cohort-42	MECP2-TG1	Male		556.51	848	298.75	124.1
Mouse-MECP2TG-Interaction-cohort-43	MECP2-TG1	Male		538.89	870	371.3	121.56
Mouse-MECP2TG-Interaction-cohort-44	MECP2-TG1	Male		516.07	1255	287.18	167.1
Mouse-MECP2TG-Interaction-cohort-45	MECP2-TG1	Female		532.22	838	373.47	160.71
Mouse-MECP2TG-Interaction-cohort-46	MECP2-TG1	Female		547.71	1063	337.21	155.26
Mouse-MECP2TG-Interaction-cohort-47	MECP2-TG1	Female		567.43	1170	266.15	60
Mouse-MECP2TG-Interaction-cohort-48	MECP2-TG1	Female		517.38	1206	331.56	143.83
Mouse-MECP2TG-Interaction-cohort-49	MECP2-TG1	Female		544.64	1069	463.2	81.02
Mouse-MECP2TG-Interaction-cohort-50	MECP2-TG1	Female		419.91	1248	306.29	254.54
Mouse-MECP2TG-Interaction-cohort-51	MECP2-TG1	Female		464.16	1262	472.62	172.29
Mouse-MECP2TG-Interaction-cohort-52	MECP2-TG1	Female		413.9	1115	450.78	375.11
Mouse-MECP2TG-Interaction-cohort-53	MECP2-TG1	Female		586.94	821	209.27	30.04
Mouse-MECP2TG-Interaction-cohort-54	MECP2-TG1	Female		545.73	1007	316.86	119.75
Mouse-MECP2TG-Interaction-cohort-55	MECP2-TG1	Female		507.08	1249	580.42	205.66
Mouse-MECP2TG-Interaction-cohort-56	MECP2-TG1	Female		550.05	832	316.98	83.67
Mouse-MECP2TG-Interaction-cohort-57	MECP2-TG1; Gdf11 tm2b/+	Male		449.6	1356	287.05	287.77
Mouse-MECP2TG-Interaction-cohort-58	MECP2-TG1; Gdf11 tm2b/+	Male		353.35	1127	337.95	319.72
Mouse-MECP2TG-Interaction-cohort-59	MECP2-TG1; Gdf11 tm2b/+	Male		461.13	1399	282.95	175.84
Mouse-MECP2TG-Interaction-cohort-60	MECP2-TG1; Gdf11 tm2b/+	Male		439.65	1475	344.61	312.17
Mouse-MECP2TG-Interaction-cohort-61	MECP2-TG1; Gdf11 tm2b/+	Male		531.37	1452	257.01	120.85
Mouse-MECP2TG-Interaction-cohort-62	MECP2-TG1; Gdf11 tm2b/+	Male		580.03	636	215.49	52.37
Mouse-MECP2TG-Interaction-cohort-63	MECP2-TG1; Gdf11 tm2b/+	Male		535.4	1149	393.74	178.38
Mouse-MECP2TG-Interaction-cohort-64	MECP2-TG1; Gdf11 tm2b/+	Male		310.92	1259	395.42	544.79
Mouse-MECP2TG-Interaction-cohort-65	MECP2-TG1; Gdf11 tm2b/+	Male		505.56	435	213.97	127.75
Mouse-MECP2TG-Interaction-cohort-66	MECP2-TG1; Gdf11 tm2b/+	Male		488.37	1474	488.18	284.1
Mouse-MECP2TG-Interaction-cohort-67	MECP2-TG1; Gdf11 tm2b/+	Male		568.43	920	231.37	43.13
Mouse-MECP2TG-Interaction-cohort-68	MECP2-TG1; Gdf11 tm2b/+	Male		518.99	1108	281.95	164.39
Mouse-MECP2TG-Interaction-cohort-69	MECP2-TG1; Gdf11 tm2b/+	Male		495.44	1178	355.21	221.48
Mouse-MECP2TG-Interaction-cohort-70	MECP2-TG1; Gdf11 tm2b/+	Male		329.07	1612	436.22	396.46
Mouse-MECP2TG-Interaction-cohort-71	MECP2-TG1; Gdf11 tm2b/+	Male		477.14	1822	256.47	128.07
Mouse-MECP2TG-Interaction-cohort-72	MECP2-TG1; Gdf11 tm2b/+	Male		414.15	1672	376.1	359.05
Mouse-MECP2TG-Interaction-cohort-73	MECP2-TG1; Gdf11 tm2b/+	Female		488.44	1234	539.65	241.57
Mouse-MECP2TG-Interaction-cohort-74	MECP2-TG1; Gdf11 tm2b/+	Female		407.7	1736	675.1	428.83
Mouse-MECP2TG-Interaction-cohort-75	MECP2-TG1; Gdf11 tm2b/+	Female		524.54	1480	649.88	191.11
Mouse-MECP2TG-Interaction-cohort-76	MECP2-TG1; Gdf11 tm2b/+	Female		493.18	2480	537.12	143.79
Mouse-MECP2TG-Interaction-cohort-77	MECP2-TG1; Gdf11 tm2b/+	Female		503.42	1611	413.98	166.53
Mouse-MECP2TG-Interaction-cohort-78	MECP2-TG1; Gdf11 tm2b/+	Female		480.5	1044	423.51	181.62
		Statistics
		test		Brown-Forsythe and Welsch ANOVA tests	Brown-Forsythe and Welsch ANOVA tests	Brown-Forsythe and Welsch ANOVA tests	Brown-Forsythe and Welsch ANOVA tests
		p-value		<0.0001	0.0004
				Dunnett's multiple comparisons	Dunnett's multiple comparisons	Dunnett's multiple comparisons	Dunnett's multiple comparisons
		p-adjusted	WT v. TG1	<0.0001	<0.0001
			WT v. TG1; tm2b/+	0.0001	0.7056
			TG1 v. TG1; tm2b/+	0.6701	0.021

## Sheet: Rotarod
Mouse ID	Genotype	Sex		Day 1 Average	Day 2 Average	Day 3 Average	Day 4 Average
Mouse-MECP2TG-Interaction-cohort-1	Wild-type	Male		140	232.25	236.75	264		Statistics
Mouse-MECP2TG-Interaction-cohort-2	Wild-type	Male		204.5	408.25	336.75	445.25		Test	2way ANOVA	Model	Genotype + Day + Genotype:Day
Mouse-MECP2TG-Interaction-cohort-3	Wild-type	Male		177.5	247.25	227.25	302.5		p-value			Genotype	0.0206
Mouse-MECP2TG-Interaction-cohort-4	Wild-type	Male		129.25	279.5	304	283					Day	<0.0001
Mouse-MECP2TG-Interaction-cohort-5	Wild-type	Male		120	199	313.25	339.5					Genotype:Day	0.3575
Mouse-MECP2TG-Interaction-cohort-6	Wild-type	Male		126	217.75	293	266
Mouse-MECP2TG-Interaction-cohort-7	Wild-type	Male		175.5	207.5	245.75	259.5				Uncorrected Fisher's LSD
Mouse-MECP2TG-Interaction-cohort-8	Wild-type	Male		131.5	187.25	197	188.25					WT vs. MECP2-TG1	0.0235
Mouse-MECP2TG-Interaction-cohort-9	Wild-type	Male		146	126.75	153.25	209					WT vs. MECP2-TG1; Gdf11 tm2b/+	0.0134
Mouse-MECP2TG-Interaction-cohort-10	Wild-type	Male		200.75	214.75	266	294.25					MECP2-TG1 vs. MECP2-TG1; Gdf11 tm2b/+	0.7529
Mouse-MECP2TG-Interaction-cohort-11	Wild-type	Male		140.25	205.5	182	197.5
Mouse-MECP2TG-Interaction-cohort-12	Wild-type	Male		180.25	312.5	294.25	328.75
Mouse-MECP2TG-Interaction-cohort-13	Wild-type	Male		158.5	228.75	280.5	296
Mouse-MECP2TG-Interaction-cohort-14	Wild-type	Male		46	495	561	600
Mouse-MECP2TG-Interaction-cohort-15	Wild-type	Male		133	243.75	293	277.25
Mouse-MECP2TG-Interaction-cohort-16	Wild-type	Male		109.75	91	117	137.25
Mouse-MECP2TG-Interaction-cohort-17	Wild-type	Male		211	205.25	180.25	162.25
Mouse-MECP2TG-Interaction-cohort-18	Wild-type	Male		191.25	184.25	233.5	168.5
Mouse-MECP2TG-Interaction-cohort-19	Wild-type	Male		187.5	415.25	426.5	352.25
Mouse-MECP2TG-Interaction-cohort-20	Wild-type	Female		279.5	300.5	320.25	304.5
Mouse-MECP2TG-Interaction-cohort-21	Wild-type	Female		202.75	241.5	275.25	247.5
Mouse-MECP2TG-Interaction-cohort-22	Wild-type	Female		227.75	230.25	164.5	197.75
Mouse-MECP2TG-Interaction-cohort-23	Wild-type	Female		233.25	259.25	263.25	266
Mouse-MECP2TG-Interaction-cohort-24	Wild-type	Female		204	246.25	250.25	245
Mouse-MECP2TG-Interaction-cohort-25	Wild-type	Female		164.75	130	127.25	105.5
Mouse-MECP2TG-Interaction-cohort-26	Wild-type	Female		288.5	308.25	349.5	379.25
Mouse-MECP2TG-Interaction-cohort-27	Wild-type	Female		190.75	261.5	188.5	192.75
Mouse-MECP2TG-Interaction-cohort-28	Wild-type	Female		155.25	200	236.5	249.25
Mouse-MECP2TG-Interaction-cohort-29	Wild-type	Female		142.5	225	201	178.25
Mouse-MECP2TG-Interaction-cohort-30	Wild-type	Female		139.5	218.75	268	219.5
Mouse-MECP2TG-Interaction-cohort-31	MECP2-TG1	Male		273.75	377.5	595	417
Mouse-MECP2TG-Interaction-cohort-32	MECP2-TG1	Male		205.75	289.25	500.5	464
Mouse-MECP2TG-Interaction-cohort-33	MECP2-TG1	Male		239.75	279.5	372.75	498.75
Mouse-MECP2TG-Interaction-cohort-34	MECP2-TG1	Male		230.75	289.5	525	496.25
Mouse-MECP2TG-Interaction-cohort-35	MECP2-TG1	Male		194.75	557.5	504.5	529.5
Mouse-MECP2TG-Interaction-cohort-36	MECP2-TG1	Male		123.5	182.25	266.5	274.75
Mouse-MECP2TG-Interaction-cohort-37	MECP2-TG1	Male		235.25	305.75	387	538.75
Mouse-MECP2TG-Interaction-cohort-38	MECP2-TG1	Male		193	236.75	195	193
Mouse-MECP2TG-Interaction-cohort-39	MECP2-TG1	Male		159.25	146	124.25	167.25
Mouse-MECP2TG-Interaction-cohort-40	MECP2-TG1	Male		192	314	476.5	577.25
Mouse-MECP2TG-Interaction-cohort-41	MECP2-TG1	Male		192	229.25	311	251.25
Mouse-MECP2TG-Interaction-cohort-42	MECP2-TG1	Male		203.25	211.5	196	291.75
Mouse-MECP2TG-Interaction-cohort-43	MECP2-TG1	Male		245	223.5	237	230.5
Mouse-MECP2TG-Interaction-cohort-44	MECP2-TG1	Male		168.5	209	218.25	263.5
Mouse-MECP2TG-Interaction-cohort-45	MECP2-TG1	Female		240.75	243.5	240.5	270.25
Mouse-MECP2TG-Interaction-cohort-46	MECP2-TG1	Female		278.5	288.25	258.25	264
Mouse-MECP2TG-Interaction-cohort-47	MECP2-TG1	Female		213	289.25	368	370.5
Mouse-MECP2TG-Interaction-cohort-48	MECP2-TG1	Female		290.75	462	416.25	407.75
Mouse-MECP2TG-Interaction-cohort-49	MECP2-TG1	Female		210.75	213.25	152	180.5
Mouse-MECP2TG-Interaction-cohort-50	MECP2-TG1	Female		135.25	313.5	276.5	344.75
Mouse-MECP2TG-Interaction-cohort-51	MECP2-TG1	Female		228.5	230.75	248.75	252.5
Mouse-MECP2TG-Interaction-cohort-52	MECP2-TG1	Female		215.25	247	245.75	260.5
Mouse-MECP2TG-Interaction-cohort-53	MECP2-TG1	Female		214.25	241.5	296.25	254.5
Mouse-MECP2TG-Interaction-cohort-54	MECP2-TG1	Female		184	303.25	495.25	451.5
Mouse-MECP2TG-Interaction-cohort-55	MECP2-TG1	Female		175.75	193.5	244.5	298
Mouse-MECP2TG-Interaction-cohort-56	MECP2-TG1	Female		229.25	243	208.5	161.25
Mouse-MECP2TG-Interaction-cohort-57	MECP2-TG1; Gdf11 tm2b/+	Male		75	154.75	212.25	255.75
Mouse-MECP2TG-Interaction-cohort-58	MECP2-TG1; Gdf11 tm2b/+	Male		167	384.25	358	559.5
Mouse-MECP2TG-Interaction-cohort-59	MECP2-TG1; Gdf11 tm2b/+	Male		53.75	379.25	276	383.5
Mouse-MECP2TG-Interaction-cohort-60	MECP2-TG1; Gdf11 tm2b/+	Male		235.5	457.75	532.75	533.5
Mouse-MECP2TG-Interaction-cohort-61	MECP2-TG1; Gdf11 tm2b/+	Male		237.25	301.25	362.75	430
Mouse-MECP2TG-Interaction-cohort-62	MECP2-TG1; Gdf11 tm2b/+	Male		188.25	267.75	203.75	265.25
Mouse-MECP2TG-Interaction-cohort-63	MECP2-TG1; Gdf11 tm2b/+	Male		225.5	288.25	363.5	367.75
Mouse-MECP2TG-Interaction-cohort-64	MECP2-TG1; Gdf11 tm2b/+	Male		43	126.75	254.25	268
Mouse-MECP2TG-Interaction-cohort-65	MECP2-TG1; Gdf11 tm2b/+	Male		246.5	280.75	370.5	426.75
Mouse-MECP2TG-Interaction-cohort-66	MECP2-TG1; Gdf11 tm2b/+	Male		210.5	228.5	321	259.25
Mouse-MECP2TG-Interaction-cohort-67	MECP2-TG1; Gdf11 tm2b/+	Male		124.75	369.5	425	469
Mouse-MECP2TG-Interaction-cohort-68	MECP2-TG1; Gdf11 tm2b/+	Male		224.75	252.5	255	283.75
Mouse-MECP2TG-Interaction-cohort-69	MECP2-TG1; Gdf11 tm2b/+	Male		279.25	266.25	341.25	229
Mouse-MECP2TG-Interaction-cohort-70	MECP2-TG1; Gdf11 tm2b/+	Male		227.5	203	186.5	129.75
Mouse-MECP2TG-Interaction-cohort-71	MECP2-TG1; Gdf11 tm2b/+	Male		205.25	525.5	430.5	600
Mouse-MECP2TG-Interaction-cohort-72	MECP2-TG1; Gdf11 tm2b/+	Male		260.5	269	369.25	554.75
Mouse-MECP2TG-Interaction-cohort-73	MECP2-TG1; Gdf11 tm2b/+	Female		83	96.75	152.25	146.25
Mouse-MECP2TG-Interaction-cohort-74	MECP2-TG1; Gdf11 tm2b/+	Female		127.25	198.75	211.75	257.5
Mouse-MECP2TG-Interaction-cohort-75	MECP2-TG1; Gdf11 tm2b/+	Female		245.75	257.25	217.5	179.75
Mouse-MECP2TG-Interaction-cohort-76	MECP2-TG1; Gdf11 tm2b/+	Female		424.25	600	508	527.25
Mouse-MECP2TG-Interaction-cohort-77	MECP2-TG1; Gdf11 tm2b/+	Female		228	366.75	328.75	320.75
Mouse-MECP2TG-Interaction-cohort-78	MECP2-TG1; Gdf11 tm2b/+	Female		354.5	308	278	295.75

## Sheet: 3-Chamber
Mouse ID	Genotype	Sex		Acclimation phase	Distance (cm)	Time - left (s)	Time - right (s)	Ratio of time (L / total)		Social phase	Distance (cm)	Time - parnter (s)	Time - cup (s)	Ratio of time (partner / total)
Mouse-MECP2TG-Interaction-cohort-1	Wild-type	Male			18.954	52.5	33.9	0.607639			15.881	75.1	46.1	0.619637
Mouse-MECP2TG-Interaction-cohort-2	Wild-type	Male			20.01	67.3	57.1	0.540997			26.087	113.3	63.5	0.640837
Mouse-MECP2TG-Interaction-cohort-3	Wild-type	Male			32.153	50.1	32.3	0.60801			29.437	67.4	60.9	0.525331
Mouse-MECP2TG-Interaction-cohort-4	Wild-type	Male			32.458	73.4	64.5	0.53227			25.318	55	74.1	0.426026
Mouse-MECP2TG-Interaction-cohort-5	Wild-type	Male			31.342	29	35.2	0.451713			20.617	73.4	31.4	0.700382
Mouse-MECP2TG-Interaction-cohort-6	Wild-type	Male			28.976	48.6	53.1	0.477876			21.917	75.8	46.2	0.621311
Mouse-MECP2TG-Interaction-cohort-7	Wild-type	Male			20.962	39.5	60.5	0.395			17.79	65.5	53.1	0.552277
Mouse-MECP2TG-Interaction-cohort-8	Wild-type	Male			38.258	61.3	31.9	0.657725			30.958	59.1	34.4	0.632086
Mouse-MECP2TG-Interaction-cohort-9	Wild-type	Male			18.005	38.4	38.8	0.497409			18.394	79.9	39.5	0.669179
Mouse-MECP2TG-Interaction-cohort-10	Wild-type	Male			28.337	42.8	65.4	0.395564			25.205	117.7	35	0.770792
Mouse-MECP2TG-Interaction-cohort-11	Wild-type	Male			34.308	59.5	45.2	0.56829			25.871	67.6	42.9	0.611765
Mouse-MECP2TG-Interaction-cohort-12	Wild-type	Male			40.196	25.8	44.9	0.364922			26.523	67.6	22	0.754464
Mouse-MECP2TG-Interaction-cohort-13	Wild-type	Male			32.394	35.8	26.6	0.573718			25.48	145.2	42.4	0.773987
Mouse-MECP2TG-Interaction-cohort-14	Wild-type	Male			49.657	32.3	52.7	0.38			31.893	146.2	37.3	0.79673
Mouse-MECP2TG-Interaction-cohort-15	Wild-type	Male			29.055	49.6	39.8	0.55481			38.918	75.9	36.9	0.672872
Mouse-MECP2TG-Interaction-cohort-16	Wild-type	Male			43.03	70.8	48	0.59596			26.467	81.1	50.2	0.617669
Mouse-MECP2TG-Interaction-cohort-17	Wild-type	Male			37.784	51.9	26.5	0.66199			27.955	46.8	21.6	0.684211
Mouse-MECP2TG-Interaction-cohort-18	Wild-type	Male			41.797	45.9	37.4	0.55102			22.738	73	31.6	0.697897
Mouse-MECP2TG-Interaction-cohort-19	Wild-type	Male			39.742	69.9	57.5	0.548666			21.927	101.6	27	0.790047
Mouse-MECP2TG-Interaction-cohort-20	Wild-type	Female			40.826	60.4	86.6	0.410884			17.24	87.3	33.4	0.723281
Mouse-MECP2TG-Interaction-cohort-21	Wild-type	Female			29.383	51.2	54.5	0.48439			17.599	103.7	29.7	0.777361
Mouse-MECP2TG-Interaction-cohort-22	Wild-type	Female			37.848	33	56.9	0.367075			15.032	88.5	21.7	0.803085
Mouse-MECP2TG-Interaction-cohort-23	Wild-type	Female			37.637	86.6	90.2	0.489819			19.194	66.9	42.5	0.611517
Mouse-MECP2TG-Interaction-cohort-24	Wild-type	Female			26.528	68	55.8	0.549273			15.188	108.5	44.5	0.70915
Mouse-MECP2TG-Interaction-cohort-25	Wild-type	Female			31.516	73.6	28.9	0.718049			22.576	121.5	73.3	0.623717
Mouse-MECP2TG-Interaction-cohort-26	Wild-type	Female			30.634	65.8	51.2	0.562393			25.393	88.5	50.2	0.638068
Mouse-MECP2TG-Interaction-cohort-27	Wild-type	Female			27.99	33.7	26.6	0.558872			33.54	105	32.6	0.763081
Mouse-MECP2TG-Interaction-cohort-28	Wild-type	Female			21.551	26.7	45.3	0.370833			21.861	88.5	45.3	0.661435
Mouse-MECP2TG-Interaction-cohort-29	Wild-type	Female			20.01	58	44.8	0.564202			27.55	93.4	20.4	0.820738
Mouse-MECP2TG-Interaction-cohort-30	Wild-type	Female			32.549	53.6	27	0.665012			22.751	94.2	58.4	0.6173
Mouse-MECP2TG-Interaction-cohort-31	MECP2-TG1	Male			36.758	88.3	69.8	0.558507			26.139	86.7	31	0.736619
Mouse-MECP2TG-Interaction-cohort-32	MECP2-TG1	Male			28.589	55.4	42	0.568789			22.873	95.6	22.6	0.808799
Mouse-MECP2TG-Interaction-cohort-33	MECP2-TG1	Male			14.027	50.4	32.8	0.605769			15.151	190.8	89.2	0.681429
Mouse-MECP2TG-Interaction-cohort-34	MECP2-TG1	Male			22.63	46.2	41.1	0.52921			15.456	107	46.6	0.696615
Mouse-MECP2TG-Interaction-cohort-35	MECP2-TG1	Male			19.027	36.7	25.8	0.5872			19.027	36.7	25.8	0.5872
Mouse-MECP2TG-Interaction-cohort-36	MECP2-TG1	Male			14.548	52.1	14.6	0.781109			14.548	52.1	14.6	0.781109
Mouse-MECP2TG-Interaction-cohort-37	MECP2-TG1	Male			21.82	47.1	52.8	0.471471			12.116	45.9	9	0.836066
Mouse-MECP2TG-Interaction-cohort-38	MECP2-TG1	Male			26.376	33.2	56.5	0.370123			20.518	52	31.9	0.619785
Mouse-MECP2TG-Interaction-cohort-39	MECP2-TG1	Male			34.118	40.8	22.8	0.641509			16.945	76.9	27	0.740135
Mouse-MECP2TG-Interaction-cohort-40	MECP2-TG1	Male			25.532	49.3	23.3	0.679063			25.859	57.6	36.1	0.614728
Mouse-MECP2TG-Interaction-cohort-41	MECP2-TG1	Male			33.998	36.9	40.2	0.478599			20.352	61.8	41.8	0.596525
Mouse-MECP2TG-Interaction-cohort-42	MECP2-TG1	Male			17.247	7.7	18.6	0.292776			26.359	81.3	13.8	0.85489
Mouse-MECP2TG-Interaction-cohort-43	MECP2-TG1	Male			23.71	78.3	50.1	0.609813			11.309	41.8	19.2	0.685246
Mouse-MECP2TG-Interaction-cohort-44	MECP2-TG1	Male			24.368	51.1	21.5	0.703857			20.357	134.9	51.8	0.72255
Mouse-MECP2TG-Interaction-cohort-45	MECP2-TG1	Female			24.852	40.5	28.7	0.58526			13.165	30.2	27.1	0.527051
Mouse-MECP2TG-Interaction-cohort-46	MECP2-TG1	Female			36.821	25.5	51.1	0.332898			21.396	46.8	37.7	0.553846
Mouse-MECP2TG-Interaction-cohort-47	MECP2-TG1	Female			39.534	52.5	27.1	0.659548			16.614	44	47.8	0.479303
Mouse-MECP2TG-Interaction-cohort-48	MECP2-TG1	Female			36.808	56	39.2	0.588235			22.436	33.5	21.5	0.609091
Mouse-MECP2TG-Interaction-cohort-49	MECP2-TG1	Female			18.939	47.7	33.8	0.585276			16.92	93.8	21	0.817073
Mouse-MECP2TG-Interaction-cohort-50	MECP2-TG1	Female			17.704	49.5	25.1	0.663539			13.576	65	19	0.77381
Mouse-MECP2TG-Interaction-cohort-51	MECP2-TG1	Female			37.006	33.6	37.1	0.475248			29.209	95.3	54.6	0.635757
Mouse-MECP2TG-Interaction-cohort-52	MECP2-TG1	Female			21.39	41.6	38.5	0.519351			10.665	65.1	40.4	0.617062
Mouse-MECP2TG-Interaction-cohort-53	MECP2-TG1	Female			25.721	66.4	34	0.661355			17.484	111.3	96	0.536903
Mouse-MECP2TG-Interaction-cohort-54	MECP2-TG1	Female			15.095	54.2	29.6	0.646778			11.768	47.7	33.1	0.590347
Mouse-MECP2TG-Interaction-cohort-55	MECP2-TG1	Female			16.215	40.9	18.9	0.683946			12.328	57.7	40.7	0.586382
Mouse-MECP2TG-Interaction-cohort-56	MECP2-TG1	Female			22.263	47.7	71.3	0.40084			14.872	62.1	76.3	0.448699
Mouse-MECP2TG-Interaction-cohort-57	MECP2-TG1; Gdf11 tm2b/+	Male			18.789	25.7	31.5	0.449301			24.571	67.6	70.6	0.489146
Mouse-MECP2TG-Interaction-cohort-58	MECP2-TG1; Gdf11 tm2b/+	Male			37.996	70.5	47	0.6			33.6	64	63.8	0.500782
Mouse-MECP2TG-Interaction-cohort-59	MECP2-TG1; Gdf11 tm2b/+	Male			35.408	57.5	38.9	0.596473			36.738	63.8	48.7	0.567111
Mouse-MECP2TG-Interaction-cohort-60	MECP2-TG1; Gdf11 tm2b/+	Male			19.863	44.4	18.1	0.7104			20.96	35.4	37.6	0.484932
Mouse-MECP2TG-Interaction-cohort-61	MECP2-TG1; Gdf11 tm2b/+	Male			34.11	67.4	71.6	0.484892			23.376	67.3	25.7	0.723656
Mouse-MECP2TG-Interaction-cohort-62	MECP2-TG1; Gdf11 tm2b/+	Male			24.536	54	43.7	0.552712			21.658	56.7	44.2	0.561943
Mouse-MECP2TG-Interaction-cohort-63	MECP2-TG1; Gdf11 tm2b/+	Male			42.079	37.1	47.7	0.4375			26.967	82	58.1	0.585296
Mouse-MECP2TG-Interaction-cohort-64	MECP2-TG1; Gdf11 tm2b/+	Male			35.615	36.9	37.2	0.497976			28.835	74.6	20.4	0.785263
Mouse-MECP2TG-Interaction-cohort-65	MECP2-TG1; Gdf11 tm2b/+	Male			28.998	54.3	29.2	0.650299			21.791	69.5	37.2	0.651359
Mouse-MECP2TG-Interaction-cohort-66	MECP2-TG1; Gdf11 tm2b/+	Male			33.846	53.4	41.1	0.565079			24.639	77.4	57.8	0.572485
Mouse-MECP2TG-Interaction-cohort-67	MECP2-TG1; Gdf11 tm2b/+	Male			36.276	60.3	43.1	0.583172			24.378	54.9	50.4	0.521368
Mouse-MECP2TG-Interaction-cohort-68	MECP2-TG1; Gdf11 tm2b/+	Male			31.937	57.9	44.5	0.56543			18.513	65.4	41.3	0.612933
Mouse-MECP2TG-Interaction-cohort-69	MECP2-TG1; Gdf11 tm2b/+	Male			30.338	48.3	19.9	0.708211			24.658	97.8	26.1	0.789346
Mouse-MECP2TG-Interaction-cohort-70	MECP2-TG1; Gdf11 tm2b/+	Male			31.576	25.1	38.2	0.396524			13.22	34.7	14.6	0.703854
Mouse-MECP2TG-Interaction-cohort-71	MECP2-TG1; Gdf11 tm2b/+	Male			33.995	41.5	41.9	0.497602			27.4	75.9	23.9	0.760521
Mouse-MECP2TG-Interaction-cohort-72	MECP2-TG1; Gdf11 tm2b/+	Male			26.07	85.7	42.1	0.670579			22.563	94.5	71.7	0.568592
Mouse-MECP2TG-Interaction-cohort-73	MECP2-TG1; Gdf11 tm2b/+	Female			45.332	67	49.2	0.576592			14.87	46.9	33	0.586984
Mouse-MECP2TG-Interaction-cohort-74	MECP2-TG1; Gdf11 tm2b/+	Female			28.808	48.7	30.7	0.61335			28.06	55	59.6	0.47993
Mouse-MECP2TG-Interaction-cohort-75	MECP2-TG1; Gdf11 tm2b/+	Female			40.55	52.9	67.3	0.4401			18.226	102.8	25.6	0.800623
Mouse-MECP2TG-Interaction-cohort-76	MECP2-TG1; Gdf11 tm2b/+	Female			25.721	54.1	46	0.54046			24.875	92.1	32.8	0.73739
Mouse-MECP2TG-Interaction-cohort-77	MECP2-TG1; Gdf11 tm2b/+	Female			37.265	75.5	31.1	0.708255			25.857	66.6	16.4	0.80241
Mouse-MECP2TG-Interaction-cohort-78	MECP2-TG1; Gdf11 tm2b/+	Female			36.524	67.1	53.9	0.554545			25.684	91.4	28.9	0.759767
			Statistics
			test		Brown-Forsythe and Welsch ANOVA tests			Brown-Forsythe and Welsch ANOVA tests			Brown-Forsythe and Welsch ANOVA tests			Brown-Forsythe and Welsch ANOVA tests
			p-value		0.0013			0.2477			<0.0001			0.4455
												Partner / Cup comparison
			test		Dunnett's multiple comparisons						Dunnett's multiple comparisons
			p-adjusted	WT v. TG1	0.0094			0.4232		WT v. TG1	0.0005			0.8879
				WT v. TG1; tm2b/+	0.978			0.3495		WT v. TG1; tm2b/+	0.998			0.4871
				TG1 v. TG1; tm2b/+	0.0036			>0.9999		TG1 v. TG1; tm2b/+	0.0007			0.8955
							L/R comparison						L/R comparison
						2way ANOVA	Model	Side+Genotype+Side:Genotype				2way ANOVA	Model	Side+Genotype+Side:Genotype
							Side	<0.0001					Side	<0.0001
							Genotype	0.0675					Genotype	0.0914
							Side:Genotype	0.2267					Side:Genotype	0.0816
						Sidak's multiple comparisons test WT vs. tm2b/+						Sidak's multiple comparisons test WT vs. tm2b/+
						p-adjusted						p-adjusted
							WT	0.4123					WT	<0.0001
							TG1	0.0068					TG1	<0.0001
							TG1; tm2b	0.0046					TG1; tm2b	<0.0001

## Sheet: Fear Conditioning
Mouse ID	Genotype	Sex	% Freezing		Training	PreTone_1	Tone_1	PostTone_1	Tone_2	PostTone_2			Context		Cued	PreTone	PostTone
Mouse-MECP2TG-Interaction-cohort-1	Wild-type	Male				0	0	2.93	69.03	7.46			29.07			10.06	74.81
Mouse-MECP2TG-Interaction-cohort-2	Wild-type	Male				0	3.54	30.7	81.42	31.34			44.8			13.17	85.63
Mouse-MECP2TG-Interaction-cohort-3	Wild-type	Male				0	6.19	3.84	39.82	0			18.31			18.64	70.07
Mouse-MECP2TG-Interaction-cohort-4	Wild-type	Male				0	0	0	21.24	10.45			15.56			1.18	79.11
Mouse-MECP2TG-Interaction-cohort-5	Wild-type	Male				0	0	12.64	35.4	0			22.49			2.51	64.74
Mouse-MECP2TG-Interaction-cohort-6	Wild-type	Male				0	7.08	25.06	33.63	10.45			31.82			37.87	78.07
Mouse-MECP2TG-Interaction-cohort-7	Wild-type	Male				0	0	15.12	46.02	17.91			33.69			21.3	72.44
Mouse-MECP2TG-Interaction-cohort-8	Wild-type	Male				0	0	4.06	38.94	11.94			16.53			0	63.7
Mouse-MECP2TG-Interaction-cohort-9	Wild-type	Male				0	0	4.29	53.98	17.91			7.02			14.79	79.85
Mouse-MECP2TG-Interaction-cohort-10	Wild-type	Female				0	0	6.77	28.32	5.97			12.89			19.67	64.59
Mouse-MECP2TG-Interaction-cohort-11	Wild-type	Female				0	10.62	16.93	59.29	0			11.82			0	86.67
Mouse-MECP2TG-Interaction-cohort-12	Wild-type	Female				0	0	2.03	39.82	0			6.04			3.85	62.96
Mouse-MECP2TG-Interaction-cohort-13	Wild-type	Female				0	0	18.74	69.03	0			13.07			6.51	68.3
Mouse-MECP2TG-Interaction-cohort-14	Wild-type	Female				0	0	7.22	81.42	52.24			46.84			32.1	81.93
Mouse-MECP2TG-Interaction-cohort-15	Wild-type	Female				0	0	7	21.24	29.85			9.24			7.25	76.74
Mouse-MECP2TG-Interaction-cohort-16	Wild-type	Female				0	0	14	3.54	5.97			7.02			2.37	63.26
Mouse-MECP2TG-Interaction-cohort-17	Wild-type	Female				0	0	1.81	45.13	0			23.64			0	31.26
Mouse-MECP2TG-Interaction-cohort-18	MECP2-TG1	Male				0	25.66	40.41	59.29	20.9			46.13			7.99	76.74
Mouse-MECP2TG-Interaction-cohort-19	MECP2-TG1	Male				0.89	0	27.09	83.19	35.82			78.04			35.21	81.33
Mouse-MECP2TG-Interaction-cohort-20	MECP2-TG1	Male	22			0	8.85	34.09	80.53	53.73			42.76			26.33	61.33
Mouse-MECP2TG-Interaction-cohort-21	MECP2-TG1	Male				2.44	36.28	50.79	53.1	62.69			50.04			28.7	73.48
Mouse-MECP2TG-Interaction-cohort-22	MECP2-TG1	Male				0	0	31.15	45.13	37.31			46.04			23.08	62.22
Mouse-MECP2TG-Interaction-cohort-23	MECP2-TG1	Male				0	7.08	10.38	50.44	64.18			46.58			15.24	72.74
Mouse-MECP2TG-Interaction-cohort-24	MECP2-TG1	Male				0	8.85	12.87	72.57	50.75			18.04			35.95	82.81
Mouse-MECP2TG-Interaction-cohort-25	MECP2-TG1	Male				0	27.43	39.05	72.57	38.81			48.44			20.12	79.56
Mouse-MECP2TG-Interaction-cohort-26	MECP2-TG1	Male				0	3.54	39.73	83.19	71.64			14.13			11.39	73.48
Mouse-MECP2TG-Interaction-cohort-27	MECP2-TG1	Male				1.55	6.19	17.16	45.13	13.43			43.82			12.72	76.59
Mouse-MECP2TG-Interaction-cohort-28	MECP2-TG1	Male				0	38.05	34.54	31.86	77.61			34.67			2.22	64.74
Mouse-MECP2TG-Interaction-cohort-29	MECP2-TG1	Male				0	39.82	44.24	90.27	64.18			28.62			8.88	77.48
Mouse-MECP2TG-Interaction-cohort-30	MECP2-TG1	Male				0	30.09	19.86	23.89	47.76			38.22			10.36	62.52
Mouse-MECP2TG-Interaction-cohort-31	MECP2-TG1	Female				0.89	15.93	65.46	43.36	80.6			56.27			11.39	70.81
Mouse-MECP2TG-Interaction-cohort-32	MECP2-TG1	Female				2.66	12.39	53.05	66.37	61.19			78.67			20.41	74.37
Mouse-MECP2TG-Interaction-cohort-33	MECP2-TG1	Female				0	15.04	20.99	80.53	46.27			60.44			34.17	56.89
Mouse-MECP2TG-Interaction-cohort-34	MECP2-TG1	Female				0	11.5	39.05	65.49	43.28			77.07			44.82	69.04
Mouse-MECP2TG-Interaction-cohort-35	MECP2-TG1	Female				0	9.73	29.8	83.19	22.39			45.6			19.67	79.82
Mouse-MECP2TG-Interaction-cohort-36	MECP2-TG1	Female				0	0	20.09	55.75	40.3			29.42			7.54	81.31
Mouse-MECP2TG-Interaction-cohort-37	MECP2-TG1	Female				0	3.54	43.79	71.68	59.7			30.49			16.57	96.14
Mouse-MECP2TG-Interaction-cohort-38	MECP2-TG1	Female				0	0	9.26	15.93	32.84			18.13			2.66	50.96
Mouse-MECP2TG-Interaction-cohort-39	MECP2-TG1	Female				0	7.08	43.12	80.53	7.46			52.98			26.18	90.67
Mouse-MECP2TG-Interaction-cohort-40	MECP2-TG1	Female				0	44.25	52.82	72.57	35.82			45.78			30.47	88.15
Mouse-MECP2TG-Interaction-cohort-41	MECP2-TG1	Female				0	0	6.09	16.81	16.42			19.02			3.11	69.19
Mouse-MECP2TG-Interaction-cohort-42	MECP2-TG1	Female				0	34.51	42.89	94.69	65.67			48			14.05	79.67
Mouse-MECP2TG-Interaction-cohort-43	MECP2-TG1; Gdf11 tm2b/+	Male				0.89	41.59	30.7	97.35	0			53.51			22.93	74.96
Mouse-MECP2TG-Interaction-cohort-44	MECP2-TG1; Gdf11 tm2b/+	Male				0	0	5.19	48.67	0			24.18			16.57	52.59
Mouse-MECP2TG-Interaction-cohort-45	MECP2-TG1; Gdf11 tm2b/+	Male				0	3.54	45.82	73.45	50.75			66.84			14.64	47.7
Mouse-MECP2TG-Interaction-cohort-46	MECP2-TG1; Gdf11 tm2b/+	Male				0	0	4.97	43.36	23.88			11.11			27.37	52.74
Mouse-MECP2TG-Interaction-cohort-47	MECP2-TG1; Gdf11 tm2b/+	Male				0	0	2.03	34.51	22.39			27.47			0	74.37
Mouse-MECP2TG-Interaction-cohort-48	MECP2-TG1; Gdf11 tm2b/+	Male				0.89	0	16.03	60.18	22.39			42.93			10.21	60.44
Mouse-MECP2TG-Interaction-cohort-49	MECP2-TG1; Gdf11 tm2b/+	Male				0	0	0.9	32.74	0			10.04			2.22	41.78
Mouse-MECP2TG-Interaction-cohort-50	MECP2-TG1; Gdf11 tm2b/+	Male				0	0	27.54	78.76	8.96			12.18			6.51	82.22
Mouse-MECP2TG-Interaction-cohort-51	MECP2-TG1; Gdf11 tm2b/+	Male				0.89	23.01	18.28	36.28	47.76			22.04			13.61	68.44
Mouse-MECP2TG-Interaction-cohort-52	MECP2-TG1; Gdf11 tm2b/+	Male				0	7.96	3.39	0	0			69.07			19.67	77.48
Mouse-MECP2TG-Interaction-cohort-53	MECP2-TG1; Gdf11 tm2b/+	Male				0	0	13.54	72.57	7.46			49.87			22.04	78.22
Mouse-MECP2TG-Interaction-cohort-54	MECP2-TG1; Gdf11 tm2b/+	Male				0	0	2.93	34.51	26.87			32.98			9.32	82.96
Mouse-MECP2TG-Interaction-cohort-55	MECP2-TG1; Gdf11 tm2b/+	Male				0	16.81	15.12	50.44	0			27.47			1.18	58.22
Mouse-MECP2TG-Interaction-cohort-56	MECP2-TG1; Gdf11 tm2b/+	Male				0	0	17.83	38.94	5.97			12.98			0.59	60
Mouse-MECP2TG-Interaction-cohort-57	MECP2-TG1; Gdf11 tm2b/+	Male				0	0	0	0	0			4.27			1.33	55.41
Mouse-MECP2TG-Interaction-cohort-58	MECP2-TG1; Gdf11 tm2b/+	Male				0	0	0	27.43	0			21.96			3.7	68.74
Mouse-MECP2TG-Interaction-cohort-59	MECP2-TG1; Gdf11 tm2b/+	Female				0	3.54	33.41	46.02	7.46			47.2			15.09	65.33
Mouse-MECP2TG-Interaction-cohort-60	MECP2-TG1; Gdf11 tm2b/+	Female				0	3.54	1.81	30.97	11.94			46.76			13.91	79.26
Mouse-MECP2TG-Interaction-cohort-61	MECP2-TG1; Gdf11 tm2b/+	Female				0	0	5.87	45.13	29.85			22.76			16.86	67.11
Mouse-MECP2TG-Interaction-cohort-62	MECP2-TG1; Gdf11 tm2b/+	Female				0	0	8.58	33.63	19.4			15.29			25.74	58.07
Mouse-MECP2TG-Interaction-cohort-63	MECP2-TG1; Gdf11 tm2b/+	Female				0	13.27	13.32	57.52	26.87			26.22			16.72	54.67
Mouse-MECP2TG-Interaction-cohort-64	MECP2-TG1; Gdf11 tm2b/+	Female				0	0	9.93	25.66	0			14.58			4.44	54.37
					Statistics
					test	2way ANOVA	Model	Phase + Genotype + Phase:Genotype					Brown-Forsythe and Welsch ANOVA tests			2way ANOVA	Model	Phase + Genotype + Phase:Genotype
					p-value		Phase	<0.0001					0.0001				Phase	<0.0001
							Genotype	<0.0001									Genotype	0.0065
							Phase:Genotype	<0.0001					Dunnett's multiple comparisons				Phase:Genotype	0.2814
												WT v. TG1	<0.0001
					Test	Tukey's multiple comparions test						WT v. TG1; tm2b/+	0.1857			Tukey's multiple comparions test
					p-adjusted			WT v. TG1	WT v. TG1; tm2b/+	TG1 v. TG1; tm2b/+		TG1 v. TG1; tm2b/+	0.0386					WT v. TG1	WT v. TG1; tm2b/+	TG1 v. TG1; tm2b/+
							PreTone_1	0.0926	0.1872	0.4117							PreTone	0.099	0.995	0.1181
							Tone_1	0.0002	0.3016	0.0191							PostTone	0.7331	0.2045	0.0101
							PostTone_1	<0.0001	0.3016	<0.0001
							Tone_2	0.0608	0.9867	0.0331
							PostTone_2	<0.0001	0.8802	<0.0001
