# Supplementary material for: MeCP2 regulates Gdf11, a dosage-sensitive gene critical for neurological function
Source: eLife. 2023 Feb 27;12:e83806. doi: 10.7554/eLife.83806 (PMC9977283; doi:10.7554/eLife.83806)
Supplement: Figure 3—source data 1. [file elife-83806-fig3-data1.xlsx]

## Sheet: Weight
Mouse ID	Genotype	Sex	Weight in gram	Week 3	Week 4	Week 5	Week 6	Week 7	Week 8	Week 9	Week 10	Week 11	Week 12	Week 13	Week 14	Week 15
Mouse-tm2b-Weights-1	Wild-type	Male		9.7	13.4	18.2	21	21.9	23.1	23.6	23.9	24.6	25.4	26.3	26.9	27.2		Statistics	Mixed-effects model		Model	Time + Genotype + Time:Genotype
Mouse-tm2b-Weights-2	Wild-type	Male		10	14	19.5	22.3	23	23.7	24.2	24.7	25.4	26.3	26.6	28	28.7			p-value		Time	< 0.0001
Mouse-tm2b-Weights-3	Wild-type	Male		8.1	11.7	18.1	21.2	22.5	23.1	24	25.2	25.8	26.1	26.8	27.6	28.5					Genotype	0.3844
Mouse-tm2b-Weights-4	Wild-type	Male		9.3	11.2	19.8	22.2	24.8	26.8	28.2	29.4	30.1	31.4	31.4	31.7	32.8					Time:Genotype	0.0527
Mouse-tm2b-Weights-5	Wild-type	Male		9	10.3	19.4	21.1	23.1	25.1	26.3	27.1	27.5	28.6	29.4	29.8	31.6
Mouse-tm2b-Weights-6	Wild-type	Male		8	10.4	20.6	22.2	24.2	26.1	26.5	27.2	27.8	28.3	29.9	29.7	30.7
Mouse-tm2b-Weights-7	Wild-type	Male		8.4	10.5	19.6	20.8	22.5	23.8	24.1	25.1	25.8	27.5	28.1	29.1	30.2
Mouse-tm2b-Weights-8	Wild-type	Male		9.3	11.4	19.6	21.1	22.7	23.6	24.4	26	26.7	27.2	28.1	28.7	30.9
Mouse-tm2b-Weights-9	Wild-type	Male		8.3	10.6	19.1	21.7	23.7	26.1	27.4	28.1	27.6	29.4	29.6	30.5	32.7
Mouse-tm2b-Weights-10	Wild-type	Male		8.9	11.6	20.2	21.1	22.5	24.3	25.1	26.3	27.5	28.4	29.1	30.5	33.4
Mouse-tm2b-Weights-11	Wild-type	Male		7.3	12.7	18.2	20.6	21.5	23.4	24	26	27	27.6	28.1	28.1	28
Mouse-tm2b-Weights-12	Wild-type	Male		7.3	13.3	18.3	21.2	21.6	23	23.4	25.7	26.6	27.3	27.1	27.5	27.1
Mouse-tm2b-Weights-13	Wild-type	Male		9.1	15	19.9	22.5	24	25.6	26.7	26.7	30.3	31.6	32	32.2	32
Mouse-tm2b-Weights-14	Wild-type	Male		7.4	10.1	16.8	18.4	20.3	22.6	22.5	24	24.9	25.2	26.5	28.7
Mouse-tm2b-Weights-15	Wild-type	Male		7.5	9.8	15.9	17.4	19.2	20.4	21.3	21.7	22.7	23.5	25.2	26.7
Mouse-tm2b-Weights-16	Wild-type	Male		7.7	13.8	18.3	19.9	22.5	24.5	25.8
Mouse-tm2b-Weights-17	Wild-type	Male		7.9	14.6	20.6	22	24.5	26.5	28.3
Mouse-tm2b-Weights-18	Wild-type	Male		9.5	17.1	20.1	22.8	25.1	25.5
Mouse-tm2b-Weights-19	Wild-type	Male		10.4	17.1	21.6	23.5	26.7	27.1
Mouse-tm2b-Weights-20	Wild-type	Male		10.4		19.6
Mouse-tm2b-Weights-21	Wild-type	Male		11.3		21.2
Mouse-tm2b-Weights-22	Wild-type	Male		8.8	16.4
Mouse-tm2b-Weights-23	Wild-type	Male		8.2	15.3
Mouse-tm2b-Weights-24	Wild-type	Male		8.8	16.8
Mouse-tm2b-Weights-25	Wild-type	Male		8.9	17
Mouse-tm2b-Weights-26	Wild-type	Male		8.2	16.7
Mouse-tm2b-Weights-27	Gdf11 tm2b/+	Male		7.4	10.3	17.1	21.8	22.8	23.4	24.7	26.1	26.7	27.4	28.3	29	29.5
Mouse-tm2b-Weights-28	Gdf11 tm2b/+	Male		6.6	9.8	15.8	20.4	21.6	21.8	22.8	23.4	24.4	24.7	25	26.2	27.1
Mouse-tm2b-Weights-29	Gdf11 tm2b/+	Male		7.3	10.5	17	22.1	23.2	24.6	25.3	26.1	26.6	27.2	27.8	27.5	27.6
Mouse-tm2b-Weights-30	Gdf11 tm2b/+	Male		6.4	9.5	15.4	19.9	21.3	22.3	23.7	24.6	25.4	25.8	27	26.6	26.4
Mouse-tm2b-Weights-31	Gdf11 tm2b/+	Male		7.6	13.3	21	25.3	23.2	23.9	25.1	25.6	26.4	27.6	28.8	28.1	29
Mouse-tm2b-Weights-32	Gdf11 tm2b/+	Male		9.3	16.1	23.7	25	25.9	26.7	28.6	29.3	29.1	30.1	31.6	32.6	33.6
Mouse-tm2b-Weights-33	Gdf11 tm2b/+	Male		7.9	14.5	21.6	23.1	23.8	24.8	25.9	26.6	28	28.9	29.9	31.2	32.3
Mouse-tm2b-Weights-34	Gdf11 tm2b/+	Male		9.3	17.3	24.1	22	26.5	26.6	28	29.2	29.4	30.3	31.5	32.4	34.3
Mouse-tm2b-Weights-35	Gdf11 tm2b/+	Male		9.6	15	24.4	25.7	27.7	29	29.9	31.9	32.3	33.6	33.8	34.2	35.9
Mouse-tm2b-Weights-36	Gdf11 tm2b/+	Male		8.3	14.8	23	25.8	28	29.5	30.8	31.1	31.9	33.6	34.5	35.2	36.6
Mouse-tm2b-Weights-37	Gdf11 tm2b/+	Male		9.8	11.7	20.9	22.9	24.3	25.4	27.2	28.3	28.6	29.7	31.1	32.1	35.2
Mouse-tm2b-Weights-38	Gdf11 tm2b/+	Male		8.9	11.9	21.4	22.2	24.1	26.1	27.2	29.2	30.7	31.7	32.4	34.2	36
Mouse-tm2b-Weights-39	Gdf11 tm2b/+	Male		8.6	11.6	22.2	24.5	26.2	28.2	29.2	30.3	31.3	32.3	33.2	33.7	36.9
Mouse-tm2b-Weights-40	Gdf11 tm2b/+	Male		6.8	12.6	18.5	22.4	24	25.4	25.8	28.6	29.2	30.7	31.3	31.5	30.2
Mouse-tm2b-Weights-41	Gdf11 tm2b/+	Male		6.9	8.9	14.5	16.7	18.7	21.3	22.5	24.5	24.5	25.2	26.8	26.7
Mouse-tm2b-Weights-42	Gdf11 tm2b/+	Male		11	12.8	19.8	21.8	25.4	27.4	28.3	29.4	29.6	30.4	32.5	33.4
Mouse-tm2b-Weights-43	Gdf11 tm2b/+	Male		6.9	13.1	18.3	20.4	23.1	23.6	24.9	26.4	27.6
Mouse-tm2b-Weights-44	Gdf11 tm2b/+	Male		9.5	15.3	21.6	23.6	25.3	26.3	28.3	28.9
Mouse-tm2b-Weights-45	Gdf11 tm2b/+	Male		7.8	12.4	16	18.2	18.3	19.2	20.6	21.5
Mouse-tm2b-Weights-46	Gdf11 tm2b/+	Male		10.5	17.6	21.7	23	25.1	26
Mouse-tm2b-Weights-47	Wild-type	Female		9.1	13	17.1	17	17.8	18.4	19.1	19.5	20.5	20.3	20.7	20.5	20.9		Statistics	Mixed-effects model		Model	Time + Genotype + Time:Genotype
Mouse-tm2b-Weights-48	Wild-type	Female		6.8	9.8	15.8	17.9	18.5	19.7	20	20.8	21.3	21.1	21.9	21	21.8			p-value		Time	< 0.0001
Mouse-tm2b-Weights-49	Wild-type	Female		8.5	11.4	15.2	16.7	17.9	18.2	18.6	19.5	19.8	19.3	20.4	20.6	20.5					Genotype	0.4315
Mouse-tm2b-Weights-50	Wild-type	Female		8.6	11.2	14.7	17.3	17.2	18.1	18.7	18.7	19.8	20.3	20	20.1	21.1					Time:Genotype	< 0.0001
Mouse-tm2b-Weights-51	Wild-type	Female		8	10.9	14.1	15.9	16.2	17	18.1	19.2	20.2	20.5	20.1	21.6	21.9
Mouse-tm2b-Weights-52	Wild-type	Female		7.5	8.3	13.7	15.6	17.3	18.3	18.5	20.3	20	21.1	21.1	21.1
Mouse-tm2b-Weights-53	Wild-type	Female		7.5	9.8	14.2	15.2	16.4	16.6	17.5	19.3	20	19	20.4	20.7
Mouse-tm2b-Weights-54	Wild-type	Female		8.7	11	15.4	17	18.1	19.1	19.5	21.1	21.5	22.7	23.1	22.5
Mouse-tm2b-Weights-55	Wild-type	Female		7.8	9.8	14.3	14.9	15.7	16.7	17.5	17.5	19	19.3	20	19.8
Mouse-tm2b-Weights-56	Wild-type	Female		7.5	13	15.5	16.8	18.8	18.9	19.5	21	21.5
Mouse-tm2b-Weights-57	Wild-type	Female		9.1	13.3	16.7	17.3	17.4	18.5	19.6	21
Mouse-tm2b-Weights-58	Wild-type	Female		9.4	13.7	16	18	18.4	19.1	20.5	21.4
Mouse-tm2b-Weights-59	Wild-type	Female		8.8	13.2	17.3	17.4	18.5	18.2	20.6	21
Mouse-tm2b-Weights-60	Wild-type	Female		8.8	13.1	16.5	17.3	17.8	18.7	20.5	20.5
Mouse-tm2b-Weights-61	Wild-type	Female		9.8	13.9	17.9	17.9	19	19
Mouse-tm2b-Weights-62	Wild-type	Female		10.9		17.6
Mouse-tm2b-Weights-63	Wild-type	Female		8.3	14.8
Mouse-tm2b-Weights-64	Gdf11 tm2b/+	Female		8.1	11.2	16.6	19.7	19.6	20.9	21.4	21.8	22.6	23.1	23	23	23.3
Mouse-tm2b-Weights-65	Gdf11 tm2b/+	Female		5.9	9	14.1	16.1	17.2	17	17.7	17.9	20	19.2	19.6	19.7	20
Mouse-tm2b-Weights-66	Gdf11 tm2b/+	Female		4.2	6.2	11	14.9	16.1	17.4	18.3	18.2	18.9	18.9	19.4	20.3	20.2
Mouse-tm2b-Weights-67	Gdf11 tm2b/+	Female		8	11.1	14.2	15.6	16.2	17.3	17.5	18.1	19	19.1	19.1	19.8	19.5
Mouse-tm2b-Weights-68	Gdf11 tm2b/+	Female		7.9	12	17.3	18.4	18.4	20.3	21.1	22.4	22	22.7	23.8	23.8	25
Mouse-tm2b-Weights-69	Gdf11 tm2b/+	Female		8.4	12.8	17.1	17.4	18.3	20.7	21	21.6	22.4	21.8	22.5	23.1	23.9
Mouse-tm2b-Weights-70	Gdf11 tm2b/+	Female		5.8	7.8	13.6	16.6	16.8	18.2	19.2	20.1	20.3	20.2	20.5	21.2	22.7
Mouse-tm2b-Weights-71	Gdf11 tm2b/+	Female		5.6	7.7	13.9	15.7	16.5	18.1	18.2	20	19.5	19.9	20.2	20.6	21.8
Mouse-tm2b-Weights-72	Gdf11 tm2b/+	Female		9.4	10.9	16.6	18.2	18.7	20.6	21.8	22	22.3	23.2	23.6	23.9	25.8
Mouse-tm2b-Weights-73	Gdf11 tm2b/+	Female		6.6	8.8	15.6	18.3	18	19.5	20.7	21.6	22	21.9	22.5	23.1	24.4
Mouse-tm2b-Weights-74	Gdf11 tm2b/+	Female		7.4	9.4	15.9	17.8	18.7	19.8	21.1	21.4	22.2	22.8	23.8	23.9	24.3
Mouse-tm2b-Weights-75	Gdf11 tm2b/+	Female		7.8	10.2	16.3	17.8	19	20.4	21.8	21.7	22.3	22.9	23.7	23.8	25.4
Mouse-tm2b-Weights-76	Gdf11 tm2b/+	Female		6.8	10.1	14	16.6	17.2	18.5	19.7	21.3	21.8	22	22.7	22.6	23.5
Mouse-tm2b-Weights-77	Gdf11 tm2b/+	Female		6.6	11	14.9	16.7	17.6	19.1	20.1	21.9	21.7	23	23	23.8	23.3
Mouse-tm2b-Weights-78	Gdf11 tm2b/+	Female		6.7	10.7	14.2	16.2	16.6	18.2	18.2	19.8	21	20.9	20.3	21.9	21.8
Mouse-tm2b-Weights-79	Gdf11 tm2b/+	Female		6.3	10.6	14.9	17	17.2	18.2	19.2	20.8	21.1	21	20.9	21	21.3
Mouse-tm2b-Weights-80	Gdf11 tm2b/+	Female		6.3	7.5	13	15.1	16.6	17.5	18.9	20.4	19.6	20.3	20.9	20.1
Mouse-tm2b-Weights-81	Gdf11 tm2b/+	Female		6.4	8.1	13.8	16.3	17.5	18.6	18.2	19.2	19.9	20.2	20.8	20.1
Mouse-tm2b-Weights-82	Gdf11 tm2b/+	Female		8	13.2	17.4	18.3	19.6	20.6	22	23.4
Mouse-tm2b-Weights-83	Gdf11 tm2b/+	Female		7.9	15.5
Mouse-tm2b-Weights-84	Gdf11 tm2b/+	Female		7.7	16.2
Mouse-tm2b-Weights-85	Gdf11 tm2b/+	Female		8.1	17.6

## Sheet: Elevated Plus Maze
Mouse ID	Genotype	Sex		Total distance (cm)	Line crossings	Open arm entries
Mouse-tm2b-cohort-1	Wild-type	Male		16.013	80	22
Mouse-tm2b-cohort-2	Wild-type	Male		16.441	87	18
Mouse-tm2b-cohort-3	Wild-type	Male		10.938	80	7
Mouse-tm2b-cohort-4	Wild-type	Male		14.541	92	18
Mouse-tm2b-cohort-5	Wild-type	Male		9.716	61	6
Mouse-tm2b-cohort-6	Wild-type	Male		19.678	106	12
Mouse-tm2b-cohort-7	Wild-type	Male		9.64	49	9
Mouse-tm2b-cohort-8	Wild-type	Male		11.36	90	21
Mouse-tm2b-cohort-9	Wild-type	Male		15.505	91	18
Mouse-tm2b-cohort-10	Wild-type	Male		11.386	66	9
Mouse-tm2b-cohort-11	Wild-type	Male		15.915	87	12
Mouse-tm2b-cohort-12	Wild-type	Male		14.985	91	16
Mouse-tm2b-cohort-13	Wild-type	Male		10.441	85	19
Mouse-tm2b-cohort-14	Wild-type	Male		17.107	105	11
Mouse-tm2b-cohort-15	Wild-type	Male		16.955	105	21
Mouse-tm2b-cohort-16	Wild-type	Female		14.254	86	6
Mouse-tm2b-cohort-17	Wild-type	Female		15.231	95	21
Mouse-tm2b-cohort-18	Wild-type	Female		13.481	78	14
Mouse-tm2b-cohort-19	Wild-type	Female		16.131	96	16
Mouse-tm2b-cohort-20	Wild-type	Female		27.76	161	31
Mouse-tm2b-cohort-21	Wild-type	Female		16.749	110	20
Mouse-tm2b-cohort-22	Wild-type	Female		10.634	73	9
Mouse-tm2b-cohort-23	Wild-type	Female		7.969	49	6
Mouse-tm2b-cohort-24	Wild-type	Female		14.227	97	12
Mouse-tm2b-cohort-25	Wild-type	Female		19.456	115	23
Mouse-tm2b-cohort-26	Wild-type	Female		10.586	69	15
Mouse-tm2b-cohort-27	Wild-type	Female		12.391	59	5
Mouse-tm2b-cohort-28	Wild-type	Female		11.518	69	9
Mouse-tm2b-cohort-29	Wild-type	Female		9.976	83	11
Mouse-tm2b-cohort-30	Gdf11 tm2b/+	Male		12.902	91	21
Mouse-tm2b-cohort-31	Gdf11 tm2b/+	Male		15.857	95	22
Mouse-tm2b-cohort-32	Gdf11 tm2b/+	Male		17.346	108	19
Mouse-tm2b-cohort-33	Gdf11 tm2b/+	Male		17.756	119	23
Mouse-tm2b-cohort-34	Gdf11 tm2b/+	Male		23.593	127	27
Mouse-tm2b-cohort-35	Gdf11 tm2b/+	Male		10.957	96	10
Mouse-tm2b-cohort-36	Gdf11 tm2b/+	Male		13.915	107	18
Mouse-tm2b-cohort-37	Gdf11 tm2b/+	Male		14.495	99	17
Mouse-tm2b-cohort-38	Gdf11 tm2b/+	Male		13.122	93	11
Mouse-tm2b-cohort-39	Gdf11 tm2b/+	Male		13.064	103	13
Mouse-tm2b-cohort-40	Gdf11 tm2b/+	Male		13.413	101	13
Mouse-tm2b-cohort-41	Gdf11 tm2b/+	Male		19.307	101	20
Mouse-tm2b-cohort-42	Gdf11 tm2b/+	Male		20.741	135	27
Mouse-tm2b-cohort-43	Gdf11 tm2b/+	Male		19.476	117	23
Mouse-tm2b-cohort-44	Gdf11 tm2b/+	Male		16.592	105	17
Mouse-tm2b-cohort-45	Gdf11 tm2b/+	Male		27.762	135	38
Mouse-tm2b-cohort-46	Gdf11 tm2b/+	Female		17.119	99	19
Mouse-tm2b-cohort-47	Gdf11 tm2b/+	Female		21.134	143	23
Mouse-tm2b-cohort-48	Gdf11 tm2b/+	Female		17.294	98	21
Mouse-tm2b-cohort-49	Gdf11 tm2b/+	Female		17.378	89	20
Mouse-tm2b-cohort-50	Gdf11 tm2b/+	Female		18.685	127	18
Mouse-tm2b-cohort-51	Gdf11 tm2b/+	Female		23.07	119	27
Mouse-tm2b-cohort-52	Gdf11 tm2b/+	Female		16.746	109	19
Mouse-tm2b-cohort-53	Gdf11 tm2b/+	Female		19.244	105	20
Mouse-tm2b-cohort-54	Gdf11 tm2b/+	Female		24.628	147	27
Mouse-tm2b-cohort-55	Gdf11 tm2b/+	Female		22.934	138	24
Mouse-tm2b-cohort-56	Gdf11 tm2b/+	Female		13.119	71	12
Mouse-tm2b-cohort-57	Gdf11 tm2b/+	Female		25.328	144	22
Mouse-tm2b-cohort-58	Gdf11 tm2b/+	Female		11.822	61	16
Mouse-tm2b-cohort-59	Gdf11 tm2b/+	Female		17.893	89	25
Mouse-tm2b-cohort-60	Gdf11 tm2b/+	Female		10.512	88	9
Mouse-tm2b-cohort-61	Gdf11 tm2b/+	Female		13.5	107	14
Mouse-tm2b-cohort-62	Gdf11 tm2b/+	Female		19.861	129	21
Mouse-tm2b-cohort-63	Gdf11 tm2b/+	Female		21.579	131	28
			Statistics
			test	Welsch's t-test	Welsch's t-test	Welsch's t-test
			p-value	0.0015	<0.0001	0.0006

## Sheet: Open Field
Mouse ID	Genotype	Sex		Total Distance (cm)	Horizontal Activity Count	Vertical Activity Count	Duration (Centroid)	Entry Count (Centroid)	Total Distance (Centroid)	Distance ratio (center / total)	Time in center ratio (center/ total)
Mouse-tm2b-cohort-1	Wild-type	Male		2797.9	5776	338	213.5	148	625.2	0.223453	0.118611
Mouse-tm2b-cohort-2	Wild-type	Male		4817.7	8587	401	415.5	291	1727.7	0.358615	0.230833
Mouse-tm2b-cohort-3	Wild-type	Male		4341.1	8183	419	232.3	186	1174	0.270438	0.129056
Mouse-tm2b-cohort-4	Wild-type	Male		4197.8	7825	496	370.2	170	1253.3	0.298561	0.205667
Mouse-tm2b-cohort-5	Wild-type	Male		4122.7	8021	316	327.4	192	1119.7	0.271594	0.181889
Mouse-tm2b-cohort-6	Wild-type	Male		3650.6	7747	362	347.1	183	1027.4	0.281433	0.192833
Mouse-tm2b-cohort-7	Wild-type	Male		2480.7	7778	250	194.6	156	334.9	0.135002	0.108111
Mouse-tm2b-cohort-8	Wild-type	Male		2732.5	6024	189	323.9	147	801.9	0.293468	0.179944
Mouse-tm2b-cohort-9	Wild-type	Male		3764.5	7682	491	474.6	255	1477.9	0.392589	0.263667
Mouse-tm2b-cohort-10	Wild-type	Male		2845.8	6585	299	287	144	728.1	0.255851	0.159444
Mouse-tm2b-cohort-11	Wild-type	Male		6408.4	10441	546	661.45	326	2845.64	0.444048	0.367472
Mouse-tm2b-cohort-12	Wild-type	Male		4732.31	11709	530	569.93	294	1842.37	0.389317	0.316628
Mouse-tm2b-cohort-13	Wild-type	Male		2509.01	6631	396	325.18	231	861.79	0.343478	0.180656
Mouse-tm2b-cohort-14	Wild-type	Male		3785.44	9576	324	438.48	287	1533.64	0.405142	0.2436
Mouse-tm2b-cohort-15	Wild-type	Male		4117.89	8446	363	254.26	260	1367.33	0.332046	0.141256
Mouse-tm2b-cohort-16	Wild-type	Female		2524.8	10642	223	606.6	213	766.3	0.303509	0.337
Mouse-tm2b-cohort-17	Wild-type	Female		5454.6	10312	333	413.7	263	1829.5	0.335405	0.229833
Mouse-tm2b-cohort-18	Wild-type	Female		3117	7272	397	390.9	128	824.4	0.264485	0.217167
Mouse-tm2b-cohort-19	Wild-type	Female		4505.4	8577	355	388.8	260	1308.1	0.29034	0.216
Mouse-tm2b-cohort-20	Wild-type	Female		6676.3	11646	680	677.6	403	2979	0.446205	0.376444
Mouse-tm2b-cohort-21	Wild-type	Female		4082.57	6815	366	538.04	209	1760.66	0.431263	0.298911
Mouse-tm2b-cohort-22	Wild-type	Female		3527.98	11530	257	483.55	378	1572.53	0.445731	0.268639
Mouse-tm2b-cohort-23	Wild-type	Female		4527.32	8213	255	266.33	233	1468.56	0.324377	0.147961
Mouse-tm2b-cohort-24	Wild-type	Female		4009.06	9160	168	262.83	274	1338.43	0.333851	0.146017
Mouse-tm2b-cohort-25	Wild-type	Female		4411.25	8528	358	683.76	346	1660.52	0.376428	0.379867
Mouse-tm2b-cohort-26	Wild-type	Female		2838.46	5795	76	230.25	136	704.46	0.248184	0.127917
Mouse-tm2b-cohort-27	Wild-type	Female		2918.91	7267	126	223	129	415.88	0.142478	0.123889
Mouse-tm2b-cohort-28	Wild-type	Female		4927.99	8807	253	301.68	203	1536.18	0.311725	0.1676
Mouse-tm2b-cohort-29	Wild-type	Female		3223.54	11538	277	502.25	319	1151.6	0.357247	0.279028
Mouse-tm2b-cohort-30	Gdf11 tm2b/+	Male		2925.3	9131	240	357.2	226	953.4	0.325915	0.198444
Mouse-tm2b-cohort-31	Gdf11 tm2b/+	Male		5312.5	9188	484	344.8	171	1411.6	0.265713	0.191556
Mouse-tm2b-cohort-32	Gdf11 tm2b/+	Male		4809.6	9701	393	505.3	212	1287.5	0.267694	0.280722
Mouse-tm2b-cohort-33	Gdf11 tm2b/+	Male		7528.7	11438	672	496.8	265	2422.8	0.321809	0.276
Mouse-tm2b-cohort-34	Gdf11 tm2b/+	Male		5248.4	10026	475	429	274	1455.3	0.277285	0.238333
Mouse-tm2b-cohort-35	Gdf11 tm2b/+	Male		3997.9	8733	301	532.9	236	1565.4	0.391556	0.296056
Mouse-tm2b-cohort-36	Gdf11 tm2b/+	Male		2465.8	8693	325	322.3	225	671.1	0.272163	0.179056
Mouse-tm2b-cohort-37	Gdf11 tm2b/+	Male		5224.1	10271	319	424.3	233	1743.7	0.33378	0.235722
Mouse-tm2b-cohort-38	Gdf11 tm2b/+	Male		3568	8765	362	279.9	195	862.9	0.241844	0.1555
Mouse-tm2b-cohort-39	Gdf11 tm2b/+	Male		4274.3	7286	686	298.1	174	1125.9	0.263412	0.165611
Mouse-tm2b-cohort-40	Gdf11 tm2b/+	Male		4834.9	9121	535	391.1	202	1547	0.319965	0.217278
Mouse-tm2b-cohort-41	Gdf11 tm2b/+	Male		5440.1	10652	839	486.1	346	2284.2	0.419882	0.270056
Mouse-tm2b-cohort-42	Gdf11 tm2b/+	Male		4422	8281	589	495.1	197	1290.8	0.291904	0.275056
Mouse-tm2b-cohort-43	Gdf11 tm2b/+	Male		8180.11	11828	825	352.81	308	2697.99	0.329823	0.196006
Mouse-tm2b-cohort-44	Gdf11 tm2b/+	Male		4087.13	7160	342	413.47	250	1600.37	0.391563	0.229706
Mouse-tm2b-cohort-45	Gdf11 tm2b/+	Male		3681.82	6831	761	140.7	147	1096.15	0.29772	0.0781667
Mouse-tm2b-cohort-46	Gdf11 tm2b/+	Female		3667.9	8583	213	382.8	164	902.8	0.246135	0.212667
Mouse-tm2b-cohort-47	Gdf11 tm2b/+	Female		4106.9	8442	404	402.2	189	1087.6	0.264823	0.223444
Mouse-tm2b-cohort-48	Gdf11 tm2b/+	Female		3207.2	8977	394	498.8	217	1078.6	0.336306	0.277111
Mouse-tm2b-cohort-49	Gdf11 tm2b/+	Female		3294.3	8611	243	498.7	189	938	0.284734	0.277056
Mouse-tm2b-cohort-50	Gdf11 tm2b/+	Female		2803.4	8304	303	228.5	216	733.9	0.261789	0.126944
Mouse-tm2b-cohort-51	Gdf11 tm2b/+	Female		5979.4	11925	752	284.8	239	1775.6	0.296953	0.158222
Mouse-tm2b-cohort-52	Gdf11 tm2b/+	Female		4366.2	10548	396	638.2	275	1773.9	0.40628	0.354556
Mouse-tm2b-cohort-53	Gdf11 tm2b/+	Female		3520.7	10488	501	418.5	272	1303.2	0.370154	0.2325
Mouse-tm2b-cohort-54	Gdf11 tm2b/+	Female		6514.4	10699	667	384.8	265	1851.1	0.284155	0.213778
Mouse-tm2b-cohort-55	Gdf11 tm2b/+	Female		4504.5	9174	494	477.7	253	1397.1	0.310157	0.265389
Mouse-tm2b-cohort-56	Gdf11 tm2b/+	Female		3504.9	7856	349	326.5	131	838.5	0.239236	0.181389
Mouse-tm2b-cohort-57	Gdf11 tm2b/+	Female		4106.3	12765	410	213.4	263	964.6	0.234907	0.118556
Mouse-tm2b-cohort-58	Gdf11 tm2b/+	Female		4821.75	11532	355	449.71	320	1950.02	0.404422	0.249839
Mouse-tm2b-cohort-59	Gdf11 tm2b/+	Female		4999.31	8971	305	330.99	312	1602.37	0.320518	0.183883
Mouse-tm2b-cohort-60	Gdf11 tm2b/+	Female		9622.12	11918	296	453.57	250	1483.53	0.154179	0.251983
Mouse-tm2b-cohort-61	Gdf11 tm2b/+	Female		2534.73	6332	125	173.72	139	751.54	0.296497	0.0965111
Mouse-tm2b-cohort-62	Gdf11 tm2b/+	Female		5849.06	9538	450	404.64	273	2075.05	0.354766	0.2248
Mouse-tm2b-cohort-63	Gdf11 tm2b/+	Female		5338.66	13254	326	337.67	304	1709.67	0.320243	0.187594
			Statistics
			test	Welsch's t-test	Welsch's t-test	Welsch's t-test	Welsch's t-test	Welsch's t-test		Welsch's t-test	Welsch's t-test
			p-value	0.033	0.0214	0.0099	0.8623	0.9975		0.403	0.8623

## Sheet: Light-Dark Box
Mouse ID	Genotype	Sex		Duration Dark	Horizontal activity dark	Total distance dark	Total distance light
Mouse-tm2b-cohort-1	Wild-type	Male		411.2	731	360.1	378.3
Mouse-tm2b-cohort-2	Wild-type	Male		383.1	1456	453.7	420.2
Mouse-tm2b-cohort-3	Wild-type	Male		424.9	906	339.4	295
Mouse-tm2b-cohort-4	Wild-type	Male		288.4	1397	584.4	295
Mouse-tm2b-cohort-5	Wild-type	Male		444.4	1817	456.2	302.4
Mouse-tm2b-cohort-6	Wild-type	Male		396.6	1235	331.3	339.7
Mouse-tm2b-cohort-7	Wild-type	Male		246.5	1135	306.9	435.2
Mouse-tm2b-cohort-8	Wild-type	Male		319.3	1701	451.1	617.1
Mouse-tm2b-cohort-9	Wild-type	Male		392	1505	547.7	438.3
Mouse-tm2b-cohort-10	Wild-type	Male		423.2	1150	376.2	293.6
Mouse-tm2b-cohort-11	Wild-type	Male		254.51	1733	676.49	963.65
Mouse-tm2b-cohort-12	Wild-type	Male		271.01	1594	796.44	1022.83
Mouse-tm2b-cohort-13	Wild-type	Male		261.82	1036	400.14	547.02
Mouse-tm2b-cohort-14	Wild-type	Male		303.75	2000	550.95	711.99
Mouse-tm2b-cohort-15	Wild-type	Male		405.48	946	440.78	372.05
Mouse-tm2b-cohort-16	Wild-type	Female		446.7	1440	352.6	307.7
Mouse-tm2b-cohort-17	Wild-type	Female		258	1333	451.2	566.1
Mouse-tm2b-cohort-18	Wild-type	Female		399.9	911	432.2	390.7
Mouse-tm2b-cohort-19	Wild-type	Female		517.4	1983	305.6	127.8
Mouse-tm2b-cohort-20	Wild-type	Female		355.4	1219	837	710.8
Mouse-tm2b-cohort-21	Wild-type	Female		462.96	2286	671.48	310.81
Mouse-tm2b-cohort-22	Wild-type	Female		422.23	1802	490.67	279.81
Mouse-tm2b-cohort-23	Wild-type	Female		414.3	2649	555.1	301.82
Mouse-tm2b-cohort-24	Wild-type	Female		437.54	2607	839.22	371.91
Mouse-tm2b-cohort-25	Wild-type	Female		337.76	1237	544.61	584.92
Mouse-tm2b-cohort-26	Wild-type	Female		355.28	1124	691.05	615.41
Mouse-tm2b-cohort-27	Wild-type	Female		361.07	1386	645.91	688.81
Mouse-tm2b-cohort-28	Wild-type	Female		315.02	1848	662.95	710.61
Mouse-tm2b-cohort-29	Wild-type	Female		256.6	1470	729.85	806.55
Mouse-tm2b-cohort-30	Gdf11 tm2b/+	Male		445.4	1115	307.1	257
Mouse-tm2b-cohort-31	Gdf11 tm2b/+	Male		340.5	1356	464.5	506.8
Mouse-tm2b-cohort-32	Gdf11 tm2b/+	Male		340.9	1383	420.7	434.1
Mouse-tm2b-cohort-33	Gdf11 tm2b/+	Male		289.1	1684	379.8	620.9
Mouse-tm2b-cohort-34	Gdf11 tm2b/+	Male		446.2	1941	699.1	444.8
Mouse-tm2b-cohort-35	Gdf11 tm2b/+	Male		440.8	2182	512.3	319
Mouse-tm2b-cohort-36	Gdf11 tm2b/+	Male		467.8	1744	291.2	158.9
Mouse-tm2b-cohort-37	Gdf11 tm2b/+	Male		409.1	1450	452	386.9
Mouse-tm2b-cohort-38	Gdf11 tm2b/+	Male		552.5	1430	382	115.4
Mouse-tm2b-cohort-39	Gdf11 tm2b/+	Male		406	1417	393.8	387.8
Mouse-tm2b-cohort-40	Gdf11 tm2b/+	Male		328.3	1532	566.1	548.9
Mouse-tm2b-cohort-41	Gdf11 tm2b/+	Male		368.5	1928	383.8	400.2
Mouse-tm2b-cohort-42	Gdf11 tm2b/+	Male		379	1033	320.7	312.9
Mouse-tm2b-cohort-43	Gdf11 tm2b/+	Male		235.34	1746	792.7	1336.03
Mouse-tm2b-cohort-44	Gdf11 tm2b/+	Male		315.78	1349	429.78	754.12
Mouse-tm2b-cohort-45	Gdf11 tm2b/+	Male		352.76	2390	699.42	666.73
Mouse-tm2b-cohort-46	Gdf11 tm2b/+	Female		479.2	1845	600.3	292.8
Mouse-tm2b-cohort-47	Gdf11 tm2b/+	Female		465	1551	399.8	223.9
Mouse-tm2b-cohort-48	Gdf11 tm2b/+	Female		521.6	806	311.5	168.8
Mouse-tm2b-cohort-49	Gdf11 tm2b/+	Female		456.5	1331	398.7	305.9
Mouse-tm2b-cohort-50	Gdf11 tm2b/+	Female		509.3	1879	370.4	220.9
Mouse-tm2b-cohort-51	Gdf11 tm2b/+	Female		417.4	2070	649.5	417.5
Mouse-tm2b-cohort-52	Gdf11 tm2b/+	Female		399.9	1517	593.1	311.1
Mouse-tm2b-cohort-53	Gdf11 tm2b/+	Female		392.8	2134	690.1	404.3
Mouse-tm2b-cohort-54	Gdf11 tm2b/+	Female		354.9	1916	733.7	548.3
Mouse-tm2b-cohort-55	Gdf11 tm2b/+	Female		455	2170	801.2	438
Mouse-tm2b-cohort-56	Gdf11 tm2b/+	Female		493.2	2793	451.8	221
Mouse-tm2b-cohort-57	Gdf11 tm2b/+	Female		457.2	3265	582.1	296.1
Mouse-tm2b-cohort-58	Gdf11 tm2b/+	Female		312.9	1721	428.76	567.2
Mouse-tm2b-cohort-59	Gdf11 tm2b/+	Female		291.19	1627	535.35	683.9
Mouse-tm2b-cohort-60	Gdf11 tm2b/+	Female		487.27	1824	540.8	232.13
Mouse-tm2b-cohort-61	Gdf11 tm2b/+	Female		357.7	1304	591.67	545.94
Mouse-tm2b-cohort-62	Gdf11 tm2b/+	Female		418.21	2311	702.49	482.36
Mouse-tm2b-cohort-63	Gdf11 tm2b/+	Female		393.19	2056	599.99	341.69
			Statistics
			test	Welsch's t-test	Welsch's t-test
			p-value	0.0333	0.0438

## Sheet: Rotarod
Mouse ID	Genotype	Sex		Day 1 Average	Day 2 Average	Day 3 Average	Day 4 Average
Mouse-tm2b-cohort-1	Wild-type	Male		142	199.5	258	246.5		Statistics
Mouse-tm2b-cohort-2	Wild-type	Male		79	125.75	137	229		Test	2way ANOVA	Model	Genotype + Day + Genotype:Day
Mouse-tm2b-cohort-3	Wild-type	Male		101	169.5	223.25	264.25		p-value			Genotype	<0.0001
Mouse-tm2b-cohort-4	Wild-type	Male		175.75	256	297	300					Day	<0.0001
Mouse-tm2b-cohort-5	Wild-type	Male		98.75	185.75	195	165.75					Genotype:Day	0.1416
Mouse-tm2b-cohort-6	Wild-type	Male		142	147.25	153.25	150.75
Mouse-tm2b-cohort-7	Wild-type	Male		96	206	237	271.25		Test	Sidak's multiple comparisons test WT vs. tm2b/+
Mouse-tm2b-cohort-8	Wild-type	Male		145.25	180.75	250.5	277.25		p-adjusted			D1	0.0357
Mouse-tm2b-cohort-9	Wild-type	Male		152.5	207.25	218.25	176.5					D2	0.0018
Mouse-tm2b-cohort-10	Wild-type	Male		133.25	231	287.25	271.25					D3	<0.0001
Mouse-tm2b-cohort-11	Wild-type	Male		290.5	297.75	297.5	300					D4	0.0044
Mouse-tm2b-cohort-12	Wild-type	Male		157	193	227.75	176.75
Mouse-tm2b-cohort-13	Wild-type	Male		167	239.75	252.25	193
Mouse-tm2b-cohort-14	Wild-type	Male		202.5	225.5	255.25	227
Mouse-tm2b-cohort-15	Wild-type	Male		184.75	206.25	287	295.5
Mouse-tm2b-cohort-16	Wild-type	Female		139.25	167.5	204.75	152.25
Mouse-tm2b-cohort-17	Wild-type	Female		120.5	173	173.75	181.75
Mouse-tm2b-cohort-18	Wild-type	Female		47	205	234	289.5
Mouse-tm2b-cohort-19	Wild-type	Female		171	223.25	241.75	266.5
Mouse-tm2b-cohort-20	Wild-type	Female		183.75	222.75	266.5	201
Mouse-tm2b-cohort-21	Wild-type	Female		230.5	246	282.75	290.5
Mouse-tm2b-cohort-22	Wild-type	Female		196	136.25	178	264.5
Mouse-tm2b-cohort-23	Wild-type	Female		196.25	248.5	240	258.25
Mouse-tm2b-cohort-24	Wild-type	Female		200	251	258.5	270
Mouse-tm2b-cohort-25	Wild-type	Female		223.75	256.25	265.5	261.25
Mouse-tm2b-cohort-26	Wild-type	Female		189.75	235.5	246.25	300
Mouse-tm2b-cohort-27	Wild-type	Female		288.25	299.5	298.25	294.5
Mouse-tm2b-cohort-28	Wild-type	Female		294.75	273	287.25	289
Mouse-tm2b-cohort-29	Wild-type	Female		290.5	299.5	300	298.5
Mouse-tm2b-cohort-30	Gdf11 tm2b/+	Male		154.25	211.75	176	200
Mouse-tm2b-cohort-31	Gdf11 tm2b/+	Male		161.5	165	169.25	153.25
Mouse-tm2b-cohort-32	Gdf11 tm2b/+	Male		119.5	198.75	241.5	281
Mouse-tm2b-cohort-33	Gdf11 tm2b/+	Male		144.5	193.25	254.75	287
Mouse-tm2b-cohort-34	Gdf11 tm2b/+	Male		163.75	225.75	202.75	228
Mouse-tm2b-cohort-35	Gdf11 tm2b/+	Male		127.25	109.25	116	120
Mouse-tm2b-cohort-36	Gdf11 tm2b/+	Male		168.75	191.75	193.5	220
Mouse-tm2b-cohort-37	Gdf11 tm2b/+	Male		96.75	100.75	120.5	137.75
Mouse-tm2b-cohort-38	Gdf11 tm2b/+	Male		100.75	191.5	149.25	225.25
Mouse-tm2b-cohort-39	Gdf11 tm2b/+	Male		108	133.75	119.75	174.5
Mouse-tm2b-cohort-40	Gdf11 tm2b/+	Male		146	113.75	136.5	148
Mouse-tm2b-cohort-41	Gdf11 tm2b/+	Male		119.5	99.5	144.75	117
Mouse-tm2b-cohort-42	Gdf11 tm2b/+	Male		75.5	136.5	128	91
Mouse-tm2b-cohort-43	Gdf11 tm2b/+	Male		114	190.75	143.75	147.75
Mouse-tm2b-cohort-44	Gdf11 tm2b/+	Male		128.25	171.5	154.25	157.5
Mouse-tm2b-cohort-45	Gdf11 tm2b/+	Male		100.75	222.5	253.25	283.25
Mouse-tm2b-cohort-46	Gdf11 tm2b/+	Female		153.75	142.5	207	252.5
Mouse-tm2b-cohort-47	Gdf11 tm2b/+	Female		86	148.25	171.5	184.5
Mouse-tm2b-cohort-48	Gdf11 tm2b/+	Female		120.25	132.5	160.75	155.75
Mouse-tm2b-cohort-49	Gdf11 tm2b/+	Female		192.5	199.5	191.5	227.75
Mouse-tm2b-cohort-50	Gdf11 tm2b/+	Female		173.5	183	165.25	145
Mouse-tm2b-cohort-51	Gdf11 tm2b/+	Female		89	79	89.5	202.5
Mouse-tm2b-cohort-52	Gdf11 tm2b/+	Female		141.25	182.25	229	216.75
Mouse-tm2b-cohort-53	Gdf11 tm2b/+	Female		134.25	230	227.75	251.75
Mouse-tm2b-cohort-54	Gdf11 tm2b/+	Female		122	231.25	291.75	282
Mouse-tm2b-cohort-55	Gdf11 tm2b/+	Female		196.75	191.75	132	231.5
Mouse-tm2b-cohort-56	Gdf11 tm2b/+	Female		144.25	209	210	228.75
Mouse-tm2b-cohort-57	Gdf11 tm2b/+	Female		196.75	211.75	279	264.75
Mouse-tm2b-cohort-58	Gdf11 tm2b/+	Female		180.5	235.5	224.25	231.75
Mouse-tm2b-cohort-59	Gdf11 tm2b/+	Female		126	179.5	195.75	240.75
Mouse-tm2b-cohort-60	Gdf11 tm2b/+	Female		225.25	201.5	151.75	187.5
Mouse-tm2b-cohort-61	Gdf11 tm2b/+	Female		130.25	216.25	212.75	203.5
Mouse-tm2b-cohort-62	Gdf11 tm2b/+	Female		120	140.25	188.5	211.75
Mouse-tm2b-cohort-63	Gdf11 tm2b/+	Female		101.75	189	142.5	206.5

## Sheet: 3-Chamber
Mouse ID	Genotype	Sex		Acclimation phase	Distance (cm)	Time - left (s)	Time - right (s)	Ratio of time (L / total)		Social phase	Distance (cm)	Time - parnter (s)	Time - cup (s)	Ratio of time (partner / total)
Mouse-tm2b-cohort-1	Wild-type	Male			27.964	36.8	55.9	0.39698			16.756	87.1	38.1	0.695687
Mouse-tm2b-cohort-2	Wild-type	Male			36.983	81.9	56.1	0.593478			26.624	129.5	80.5	0.616667
Mouse-tm2b-cohort-3	Wild-type	Male			26.248	29.3	52	0.360394			23.839	66.4	45.1	0.595516
Mouse-tm2b-cohort-4	Wild-type	Male			33.176	67.7	34.5	0.662427			25.564	150.7	34.9	0.811961
Mouse-tm2b-cohort-5	Wild-type	Male			23.505	52.8	50.2	0.512621			16.192	131.9	58.1	0.694211
Mouse-tm2b-cohort-6	Wild-type	Male			35.073	97.1	73.8	0.568169			25.321	126.9	55.4	0.696105
Mouse-tm2b-cohort-7	Wild-type	Male			30.167	75.1	65.8	0.533002			21.17	132.5	44.9	0.7469
Mouse-tm2b-cohort-8	Wild-type	Male			26.669	70	51.5	0.576132			14.579	121.1	35.9	0.771338
Mouse-tm2b-cohort-9	Wild-type	Male			30.339	53.7	61.6	0.465742			28.004	169.6	76.3	0.689711
Mouse-tm2b-cohort-10	Wild-type	Male			25.798	97.8	82.9	0.541229			15.292	168.8	47.2	0.781481
Mouse-tm2b-cohort-11	Wild-type	Male			43.624	58.9	38.7	0.603484			28.176	117.1	37.6	0.756949
Mouse-tm2b-cohort-12	Wild-type	Male			29.928	74.1	53.3	0.581633			26.566	104.3	54.7	0.655975
Mouse-tm2b-cohort-13	Wild-type	Male			22.801	44.4	41.4	0.517483			12.344	79.3	21.2	0.789055
Mouse-tm2b-cohort-14	Wild-type	Male			34.656	48.5	34.7	0.582933			29.187	80.2	26.2	0.753759
Mouse-tm2b-cohort-15	Wild-type	Male			28.461	71.1	54.6	0.565632			21.834	77.8	19.4	0.800412
Mouse-tm2b-cohort-16	Wild-type	Female			39.29	31.4	36.6	0.461765			18.975	58.9	23.9	0.711353
Mouse-tm2b-cohort-17	Wild-type	Female			30.724	33.8	45.2	0.427848			21.523	84.1	32.8	0.719418
Mouse-tm2b-cohort-18	Wild-type	Female			26.703	26.9	34.9	0.435275			18.447	39.7	14.2	0.736549
Mouse-tm2b-cohort-19	Wild-type	Female			39.808	57.1	62.8	0.47623			31.774	66.8	39.7	0.62723
Mouse-tm2b-cohort-20	Wild-type	Female			32.58	35.1	37.5	0.483471			30.083	91.4	44.2	0.674041
Mouse-tm2b-cohort-21	Wild-type	Female			33.063	130.6	36.9	0.779701			19.917	155	53	0.745192
Mouse-tm2b-cohort-22	Wild-type	Female			38.014	94.7	66.3	0.588199			24.886	101.7	80.4	0.558484
Mouse-tm2b-cohort-23	Wild-type	Female			29.033	66	27.5	0.705882			19.461	108.6	48	0.693487
Mouse-tm2b-cohort-24	Wild-type	Female			40.465	72.7	34.1	0.680712			29.026	79.2	43.2	0.647059
Mouse-tm2b-cohort-25	Wild-type	Female			35.282	51.5	42.4	0.548456			19.637	115.3	29.1	0.798476
Mouse-tm2b-cohort-26	Wild-type	Female			43.981	78.4	35.3	0.689534			30.683	115.6	26.1	0.815808
Mouse-tm2b-cohort-27	Wild-type	Female			35.402	68.8	48.1	0.588537			17.403	73.4	38	0.658887
Mouse-tm2b-cohort-28	Wild-type	Female			38.99	89.7	43.8	0.67191			28.844	114.9	44.8	0.719474
Mouse-tm2b-cohort-29	Wild-type	Female			35.976	71.2	47	0.602369			21.013	89.1	30.3	0.746231
Mouse-tm2b-cohort-30	Gdf11 tm2b/+	Male			32.096	42.5	23.4	0.644917			24.345	79.5	50.4	0.612009
Mouse-tm2b-cohort-31	Gdf11 tm2b/+	Male			33.128	47.2	37.7	0.555948			28.416	141.5	59	0.705736
Mouse-tm2b-cohort-32	Gdf11 tm2b/+	Male			38.847	63.3	48.9	0.564171			27.233	81.1	55.2	0.595011
Mouse-tm2b-cohort-33	Gdf11 tm2b/+	Male			41.25	31	65.3	0.321911			34.695	52.5	72.4	0.420336
Mouse-tm2b-cohort-34	Gdf11 tm2b/+	Male			31.397	44.3	37.4	0.542228			24.625	109.5	55.7	0.662833
Mouse-tm2b-cohort-35	Gdf11 tm2b/+	Male			29.417	61.1	37.5	0.619675			21.964	92.1	36	0.71897
Mouse-tm2b-cohort-36	Gdf11 tm2b/+	Male			23.99	46.8	50.2	0.482474			17.455	114.7	46.5	0.711538
Mouse-tm2b-cohort-37	Gdf11 tm2b/+	Male			29.99	56.8	37	0.605544			22.405	62.4	75.9	0.451193
Mouse-tm2b-cohort-38	Gdf11 tm2b/+	Male			21.278	34.8	25.8	0.574257			20.026	112.1	66.5	0.62766
Mouse-tm2b-cohort-39	Gdf11 tm2b/+	Male			26.621	85.8	60.2	0.587671			17.823	142.3	70	0.670278
Mouse-tm2b-cohort-40	Gdf11 tm2b/+	Male			37.104	51.4	57.8	0.470696			27.965	64.5	126.5	0.337696
Mouse-tm2b-cohort-41	Gdf11 tm2b/+	Male			29.199	61.6	65.7	0.483896			22.191	132.2	80.3	0.622118
Mouse-tm2b-cohort-42	Gdf11 tm2b/+	Male			34.992	29.4	42	0.411765			28.06	56.9	44.6	0.560591
Mouse-tm2b-cohort-43	Gdf11 tm2b/+	Male			41.252	68.1	56.7	0.545673			32.274	77.3	97.2	0.44298
Mouse-tm2b-cohort-44	Gdf11 tm2b/+	Male			31.332	88.7	45.8	0.65948			27.635	80	125.9	0.388538
Mouse-tm2b-cohort-45	Gdf11 tm2b/+	Male			44.493	55.4	44.8	0.552894			31.148	86	63.7	0.574482
Mouse-tm2b-cohort-46	Gdf11 tm2b/+	Female			48.807	62.2	70.2	0.469789			33.306	112.6	68.8	0.620728
Mouse-tm2b-cohort-47	Gdf11 tm2b/+	Female			33.498	42.1	50.5	0.454644			20.248	98.7	58.4	0.628262
Mouse-tm2b-cohort-48	Gdf11 tm2b/+	Female			33.428	36	37.4	0.490463			12.982	71.3	5.5	0.928385
Mouse-tm2b-cohort-49	Gdf11 tm2b/+	Female			44.508	36.9	45.1	0.45			36.991	47.9	61.2	0.439047
Mouse-tm2b-cohort-50	Gdf11 tm2b/+	Female			32.281	55.2	66.6	0.453202			18.636	55	42.5	0.564103
Mouse-tm2b-cohort-51	Gdf11 tm2b/+	Female			27.07	38.7	44.1	0.467391			29.64	57.1	26.2	0.685474
Mouse-tm2b-cohort-52	Gdf11 tm2b/+	Female			35.413	44.2	43.5	0.503991			28.62	79.2	51.5	0.605968
Mouse-tm2b-cohort-53	Gdf11 tm2b/+	Female			44.238	31.3	32.5	0.490596			29.996	69.6	36.9	0.653521
Mouse-tm2b-cohort-54	Gdf11 tm2b/+	Female			48.706	75.4	56.4	0.572079			36.982	63.7	43	0.597001
Mouse-tm2b-cohort-55	Gdf11 tm2b/+	Female			35.875	59.5	86.3	0.408093			31.424	104.1	59.6	0.635919
Mouse-tm2b-cohort-56	Gdf11 tm2b/+	Female			28.85	36.8	44.7	0.451534			18.683	94.2	27.2	0.775947
Mouse-tm2b-cohort-57	Gdf11 tm2b/+	Female			36.453	66.2	54.7	0.54756			21.384	94.1	120.9	0.437674
Mouse-tm2b-cohort-58	Gdf11 tm2b/+	Female			42.058	51.6	22.4	0.697297			32.158	90.8	57.9	0.610625
Mouse-tm2b-cohort-59	Gdf11 tm2b/+	Female			43.283	87.5	68.5	0.560897			31.148	89.1	31.5	0.738806
Mouse-tm2b-cohort-60	Gdf11 tm2b/+	Female			36.605	61.9	32.8	0.653643			22.981	84.5	84.8	0.499114
Mouse-tm2b-cohort-61	Gdf11 tm2b/+	Female			35.788	48.6	43	0.530568			24.01	79.2	40.4	0.662207
Mouse-tm2b-cohort-62	Gdf11 tm2b/+	Female			46.208	93.3	89.7	0.509836			38.094	69.5	76.9	0.474727
Mouse-tm2b-cohort-63	Gdf11 tm2b/+	Female			49.225	111.6	55.2	0.669065			41.104	76.1	111.2	0.4063
				Statistics
				test	Welsch's t-test			Welsch's t-test			Welsch's t-test			Welsch's t-test
				p-value	0.0565			0.2142			0.0098			<0.0001
							L/R comparison					Partner / Cup comparison
				test		2way ANOVA	Model	Side+Genotype+Side:Genotype			test	2way ANOVA	Model	Partner_Cup+Genotype+Partner_Cup:Genotype
				p-value			Side	<0.0001			p-value		Partner_Cup	<0.0001
							Genotype	0.3532					Genotype	0.0914
							Side:Genotype	0.0878					Partner_Cup	0.0816
						Sidak's multiple comparisons test WT vs. tm2b/+						Sidak's multiple comparisons test Partner v. Cup
						p-adjusted						p-adjusted
							Left	0.1591					WT	<0.0001
							Right	0.9752					tm2b/+	0.0002

## Sheet: Fear Conditioning
Mouse ID	Genotype	Sex	% Freezing		Training	PreTone_1	Tone_1	PostTone_1	Tone_2	PostTone_2		Context		Cued	PreTone	PostTone
Mouse-tm2b-cohort-fear_conditioning-1	Wild-type	Male				0.89	7.96	11.96	34.51	40.3		24.44			15.68	67.85
Mouse-tm2b-cohort-fear_conditioning-2	Wild-type	Male				0	3.54	47.86	17.7	13.43		15.47			10.36	57.93
Mouse-tm2b-cohort-fear_conditioning-3	Wild-type	Male				0	0	11.74	57.52	0		21.42			20.86	74.96
Mouse-tm2b-cohort-fear_conditioning-4	Wild-type	Male				0	7.96	18.96	38.05	25.37		53.87			9.02	73.48
Mouse-tm2b-cohort-fear_conditioning-5	Wild-type	Male				0	3.54	47.4	60.18	11.94		29.07			21.75	72.3
Mouse-tm2b-cohort-fear_conditioning-6	Wild-type	Male				1.11	9.73	12.42	47.79	0		24.18			15.98	79.85
Mouse-tm2b-cohort-fear_conditioning-7	Wild-type	Male				0	0	23.93	74.34	46.27		29.16			19.97	84.44
Mouse-tm2b-cohort-fear_conditioning-8	Wild-type	Male				0	0	11.74	61.06	23.88		28.89			18.49	61.78
Mouse-tm2b-cohort-fear_conditioning-9	Wild-type	Male				0	0	1.81	37.17	47.76		23.91			17.9	70.07
Mouse-tm2b-cohort-fear_conditioning-10	Wild-type	Male				1.33	0	9.03	52.21	11.94		16.98			11.98	67.85
Mouse-tm2b-cohort-fear_conditioning-11	Wild-type	Male				0	0	12.87	54.87	32.84		17.07			0.74	69.78
Mouse-tm2b-cohort-fear_conditioning-12	Wild-type	Male				0	0	17.16	36.28	14.93		24.44			8.73	73.04
Mouse-tm2b-cohort-fear_conditioning-13	Wild-type	Male				0	0	2.26	27.43	14.93		5.96			1.92	36.89
Mouse-tm2b-cohort-fear_conditioning-14	Wild-type	Male				0	0	4.06	9.73	0		24.36			6.21	52
Mouse-tm2b-cohort-fear_conditioning-15	Wild-type	Male				0	0	0.9	25.66	0		17.6			0	41.78
Mouse-tm2b-cohort-fear_conditioning-16	Wild-type	Male				0	5.31	4.97	0	14.93		1.33			10.65	71.41
Mouse-tm2b-cohort-fear_conditioning-17	Wild-type	Female				0	12.39	20.99	25.66	35.82		8.89			3.85	73.63
Mouse-tm2b-cohort-fear_conditioning-18	Wild-type	Female				0.89	0	7.45	8.85	7.46		8.71			5.62	53.78
Mouse-tm2b-cohort-fear_conditioning-19	Wild-type	Female				0	0	24.15	47.79	28.36		30.84			31.95	68.15
Mouse-tm2b-cohort-fear_conditioning-20	Wild-type	Female				3.77	15.04	33.86	68.14	46.27		37.42			15.24	69.78
Mouse-tm2b-cohort-fear_conditioning-21	Wild-type	Female				0	4.42	5.19	3.54	25.37		16			0	37.33
Mouse-tm2b-cohort-fear_conditioning-22	Wild-type	Female				0	15.04	47.86	6.19	56.72		22.67			11.39	36.44
Mouse-tm2b-cohort-fear_conditioning-23	Wild-type	Female				0	0	26.86	71.68	20.9		32.89			16.72	88.89
Mouse-tm2b-cohort-fear_conditioning-24	Wild-type	Female				0	0	7.9	35.4	7.46		28.27			8.73	36.89
Mouse-tm2b-cohort-fear_conditioning-25	Wild-type	Female				0	3.54	25.73	39.82	14.93		18.4			1.04	57.78
Mouse-tm2b-cohort-fear_conditioning-26	Wild-type	Female				0	0	2.93	45.13	0		38.84			10.95	58.37
Mouse-tm2b-cohort-fear_conditioning-27	Wild-type	Female				0	0	13.32	23.01	0		8.71			15.68	74.52
Mouse-tm2b-cohort-fear_conditioning-28	Wild-type	Female				0	0	12.87	35.4	31.34		51.73			16.27	83.85
Mouse-tm2b-cohort-fear_conditioning-29	Gdf11 tm2b/+	Male				0	0	1.81	0	5.97		20.27			9.02	46.07
Mouse-tm2b-cohort-fear_conditioning-30	Gdf11 tm2b/+	Male				0	0	7.67	23.01	0		22.13			11.09	60
Mouse-tm2b-cohort-fear_conditioning-31	Gdf11 tm2b/+	Male				0	0	2.71	30.97	0		9.51			7.54	69.48
Mouse-tm2b-cohort-fear_conditioning-32	Gdf11 tm2b/+	Male				0	0	5.19	47.79	5.97		31.38			9.47	31.26
Mouse-tm2b-cohort-fear_conditioning-33	Gdf11 tm2b/+	Male				0	0	6.55	14.16	5.97		20.36			12.28	22.96
Mouse-tm2b-cohort-fear_conditioning-34	Gdf11 tm2b/+	Male				0	0	13.77	23.89	0		26.93			9.02	57.93
Mouse-tm2b-cohort-fear_conditioning-35	Gdf11 tm2b/+	Male				0	0	0	32.74	0		2.31			2.07	44.3
Mouse-tm2b-cohort-fear_conditioning-36	Gdf11 tm2b/+	Male				0.89	0	1.35	0	0		6.4			3.55	46.67
Mouse-tm2b-cohort-fear_conditioning-37	Gdf11 tm2b/+	Male				0	0	2.03	6.19	0		8.36			3.25	41.93
Mouse-tm2b-cohort-fear_conditioning-38	Gdf11 tm2b/+	Female				0	5.31	14.67	43.36	0		10.76			10.36	64.89
Mouse-tm2b-cohort-fear_conditioning-39	Gdf11 tm2b/+	Female				2.66	0	21.44	48.67	55.22		26.58			24.26	50.96
Mouse-tm2b-cohort-fear_conditioning-40	Gdf11 tm2b/+	Female				0	22.12	55.3	73.45	0		32.53			32.69	77.93
Mouse-tm2b-cohort-fear_conditioning-41	Gdf11 tm2b/+	Female				0	0	5.87	23.01	28.36		17.6			15.38	61.48
Mouse-tm2b-cohort-fear_conditioning-42	Gdf11 tm2b/+	Female				0	0	8.13	11.5	5.97		11.64			2.37	67.06
Mouse-tm2b-cohort-fear_conditioning-43	Gdf11 tm2b/+	Female				0	0	0	38.05	11.94		13.69			2.81	54.07
Mouse-tm2b-cohort-fear_conditioning-44	Gdf11 tm2b/+	Female				0	3.54	24.38	0	7.46		23.64			3.25	56.15
Mouse-tm2b-cohort-fear_conditioning-45	Gdf11 tm2b/+	Female				1.77	0	10.16	27.43	0		19.73			16.12	53.19
Mouse-tm2b-cohort-fear_conditioning-46	Gdf11 tm2b/+	Female				0	0	0	23.89	0		8.09			2.96	60.3
Mouse-tm2b-cohort-fear_conditioning-47	Gdf11 tm2b/+	Female				0	0	16.7	42.48	14.93		4.44			7.1	72.44
Mouse-tm2b-cohort-fear_conditioning-48	Gdf11 tm2b/+	Female				0	0	21.9	14.16	28.36		9.16			7.1	58.37
Mouse-tm2b-cohort-fear_conditioning-49	Gdf11 tm2b/+	Female				0	0	0.9	21.24	16.42		3.82			9.76	67.26
Mouse-tm2b-cohort-fear_conditioning-50	Gdf11 tm2b/+	Female				0	0	1.35	30.97	0		8.53			2.51	47.7
Mouse-tm2b-cohort-fear_conditioning-51	Gdf11 tm2b/+	Female				0	23.01	5.87	27.43	0		12			10.95	72.59
Mouse-tm2b-cohort-fear_conditioning-52	Gdf11 tm2b/+	Female				0	0	9.48	73.45	40.3		4.8			0	64.15
				Statistics
				test	2way ANOVA	Model	Phase + Genotype + Phase:Genotype					Welsch's t-test			2way ANOVA	Model	Phase + Genotype + Phase:Genotype
				p-value		Phase	<0.0001					0.0046				Phase	<0.0001
						Genotype	0.0107									Genotype	0.0468
						Phase:Genotype	0.082									Phase:Genotype	0.1691
				Test	Sidak's multiple comparisons test WT vs. tm2b/+										Sidak's multiple comparisons test WT vs. tm2b/+
				p-adjusted											p-adjusted
						PreTone_1	>0.9999									PreTone		0.6296
						Tone_1	0.9997									PostTone		0.0302
						PostTone_1	0.2827
						Tone_2	0.0691
						PostTone_2	0.015
