# Supplementary material for: MeCP2 regulates Gdf11, a dosage-sensitive gene critical for neurological function
Source: eLife. 2023 Feb 27;12:e83806. doi: 10.7554/eLife.83806 (PMC9977283; doi:10.7554/eLife.83806)
Supplement: Figure 4—source data 1. [file elife-83806-fig4-data1.xlsx]

## Sheet: EdU+
Animal ID	Genotype	Sex	Image #	EdU+	Area (um^2)	ssf/asf	Thickness	Effective thickness (um)	Total EdU/section	Volume of DG/setion	Total volume of DG			Total Estimated population	Density (Total est. pop./Total Vol.)	Total Stain
Mouse-1	Wild-type	Male	1	26	197847	6	40	27.84	37.3563	7.91389e+06	5.15243e+08			3289.83	6.38501e-06	173
Mouse-1	Wild-type	Male	2	32	196197	6	40	30.32	42.2164	7.84787e+06
Mouse-1	Wild-type	Male	3	21	201184	6	40	28.59	29.3809	8.04735e+06
Mouse-1	Wild-type	Male	4	33	165239	6	40	21.62	61.0546	6.60955e+06
Mouse-1	Wild-type	Male	5	28	158883	6	40	25.34	44.1989	6.35531e+06
Mouse-1	Wild-type	Male	6	33	154074	6	40	22.02	59.9455	6.16296e+06
Mouse-2	Wild-type	Female	1	23	201814	6	40	20.15	45.6576	8.07257e+06	5.69909e+08			2336.66	4.10007e-06	134
Mouse-2	Wild-type	Female	2	28	215114	6	40	30.34	36.915	8.60456e+06
Mouse-2	Wild-type	Female	3	24	203542	6	40	28.8	33.3333	8.14167e+06
Mouse-2	Wild-type	Female	4	21	195245	6	40	30.63	27.4241	7.80982e+06
Mouse-2	Wild-type	Female	5	27	188652	6	40	30.71	35.1677	7.54609e+06
Mouse-2	Wild-type	Female	6	11	182942	6	40	27.12	16.2242	7.31766e+06
Mouse-3	Wild-type	Female	1	27	240246	6	40	30.09	35.8923	9.60986e+06	5.46615e+08			3418.76	6.25443e-06	202
Mouse-3	Wild-type	Female	2	33	147334	6	40	28.8	45.8333	5.89338e+06
Mouse-3	Wild-type	Female	3	28	182555	6	40	29.9	37.4582	7.3022e+06
Mouse-3	Wild-type	Female	4	25	200236	6	40	27.2	36.7647	8.00944e+06
Mouse-3	Wild-type	Female	5	49	216749	6	40	25.46	76.9835	8.66994e+06
Mouse-3	Wild-type	Female	6	40	151661	6	40	30.79	51.9649	6.06644e+06
Mouse-4	Gdf11 tm2b/+	Male	1	35	201302	6	40	29.33	47.7327	8.05207e+06	5.03965e+08			3014.69	5.98193e-06	167
Mouse-4	Gdf11 tm2b/+	Male	2	36	204401	6	40	30.34	47.4621	8.17604e+06
Mouse-4	Gdf11 tm2b/+	Male	3	24	207985	6	40	28.57	33.6017	8.3194e+06
Mouse-4	Gdf11 tm2b/+	Male	4	22	150612	6	40	29.21	30.1267	6.02448e+06
Mouse-4	Gdf11 tm2b/+	Male	5	26	132851	6	40	26.01	39.9846	5314022
Mouse-4	Gdf11 tm2b/+	Male	6	24	152777	6	40	18.35	52.3161	6111090
Mouse-5	Gdf11 tm2b/+	Male	1	15	185025	6	40	24.68	24.3112	7.40101e+06	5.02418e+08			1405.18	2.79684e-06	72
Mouse-5	Gdf11 tm2b/+	Male	2	28	205919	6	40	30.28	36.9881	8.23677e+06
Mouse-5	Gdf11 tm2b/+	Male	3	0	205839	6	40	20.17	0	8.23354e+06
Mouse-5	Gdf11 tm2b/+	Male	4	22	149430	6	40	20	44	5.9772e+06
Mouse-5	Gdf11 tm2b/+	Male	5	0	147200	6	40	25.38	0	5.888e+06
Mouse-5	Gdf11 tm2b/+	Male	6	7	153291	6	40	23.73	11.7994	6.13163e+06
Mouse-6	Gdf11 tm2b/+	Male	1	59	174198	6	40	22.18	106.402	6.9679e+06	4.50304e+08			4967.06	1.10305e-05	245
Mouse-6	Gdf11 tm2b/+	Male	2	25	176476	6	40	26.61	37.5799	7.05903e+06
Mouse-6	Gdf11 tm2b/+	Male	3	36	154787	6	40	27.1	53.1365	6.19148e+06
Mouse-6	Gdf11 tm2b/+	Male	4	43	143789	6	40	22.96	74.9129	5.75156e+06
Mouse-6	Gdf11 tm2b/+	Male	5	35	142432	6	40	24.91	56.2023	5.69729e+06
Mouse-6	Gdf11 tm2b/+	Male	6	47	146451	6	40	21.94	85.6882	5.85803e+06
Mouse-7	Gdf11 tm2b/+	Female	1	33	221417	6	40	19.02	69.4006	8.85668e+06	5.4861e+08			2579	4.70097e-06	135
Mouse-7	Gdf11 tm2b/+	Female	2	10	197115	6	40	26.21	15.2614	7.88461e+06
Mouse-7	Gdf11 tm2b/+	Female	3	28	179524	6	40	29.45	38.0306	7.18095e+06
Mouse-7	Gdf11 tm2b/+	Female	4	16	177525	6	40	23.86	26.8231	7.10098e+06
Mouse-7	Gdf11 tm2b/+	Female	5	28	179316	6	40	29.83	37.5461	7.17265e+06
Mouse-7	Gdf11 tm2b/+	Female	6	20	188041	6	40	28.72	27.8552	7.52165e+06
Mouse-8	Gdf11 tm2b/+	Female	1	31	149377	6	40	25.81	48.0434	5.97509e+06	5.10913e+08			3887.15	7.60824e-06	238
Mouse-8	Gdf11 tm2b/+	Female	2	44	145735	6	40	27.69	63.5609	5.82939e+06
Mouse-8	Gdf11 tm2b/+	Female	3	45	196332	6	40	31.99	56.2676	7.8533e+06
Mouse-8	Gdf11 tm2b/+	Female	4	45	216276	6	40	31.41	57.3066	8.65103e+06
Mouse-8	Gdf11 tm2b/+	Female	5	33	193241	6	40	33.06	39.9274	7.72964e+06
Mouse-8	Gdf11 tm2b/+	Female	6	40	163441	6	40	27.2	58.8235	6.53764e+06
														Figure 4A - left	Figure 4A - right	Figure S4A
													Statistics
													Test	Welsch's t-test	Welsch's t-test	Welsch's t-test
													p-value	0.8297	0.6135	0.9651

## Sheet: Sox2+
Animal ID	Genotype	Sex	Image #	Sox2+	Area of DG (um^2)	ssf/asf	Thickness (um)	Effective Thickness (um)	Total Sox2/section	Volume of DG/setion	Total volume		Total Estimated population	Density (Total est. pop./Total Vol.)	Total SOX2
Mouse-1	Wild-type	Male	1	129	177783	10	40	17.15	300.875	7.11134e+06	4.52481e+08		27104	5.99009e-05	442
Mouse-1	Wild-type	Male	2	165	180958	10	40	16.01	412.242	7.23834e+06
Mouse-1	Wild-type	Male	3	148	206859	10	40	9.22	642.082	8.27436e+06
Mouse-2	Wild-type	Female	1	136	199383	10	40	19.14	284.222	7.97531e+06	5.74325e+08		21945.8	3.82114e-05	435
Mouse-2	Wild-type	Female	2	136	240135	10	40	13.49	403.262	9.60539e+06
Mouse-2	Wild-type	Female	3	163	278389	10	40	15.91	409.805	1.11356e+07
Mouse-3	Wild-type	Female	1	98	155506	10	40	11.48	341.463	6.22023e+06	4.8694e+08		22543.9	4.62971e-05	436
Mouse-3	Wild-type	Female	2	178	209644	10	40	17.73	401.579	8.38576e+06
Mouse-3	Wild-type	Female	3	160	243525	10	40	16.66	384.154	9.741e+06
Mouse-4	Gdf11 tm2b/+	Male	1	71	160434	10	40	13.45	211.152	6.41736e+06	4.62424e+08		23368.8	5.05353e-05	412
Mouse-4	Gdf11 tm2b/+	Male	2	178	202935	10	40	11.52	618.056	8.1174e+06
Mouse-4	Gdf11 tm2b/+	Male	3	163	214661	10	40	19.22	339.23	8.58645e+06
Mouse-5	Gdf11 tm2b/+	Male	1	66	162460	10	40	15.56	169.666	6.49838e+06	463564892		22711.8	4.89938e-05	455
Mouse-5	Gdf11 tm2b/+	Male	2	181	204593	10	40	15.62	463.508	8.18371e+06
Mouse-5	Gdf11 tm2b/+	Male	3	208	212404	10	40	16.56	502.415	8.49615e+06
Mouse-6	Gdf11 tm2b/+	Male	1	56	128959	10	40	12.3	182.114	5.15834e+06	403138148		22638.6	5.6156e-05	340
Mouse-6	Gdf11 tm2b/+	Male	2	123	151014	10	40	14.14	347.949	6.04055e+06
Mouse-6	Gdf11 tm2b/+	Male	3	161	223950	10	40	10.7	601.869	8.95802e+06
Mouse-7	Gdf11 tm2b/+	Female	1	75	174229	10	40	13.14	228.311	6.96915e+06	4.73642e+08		20861.4	4.40446e-05	374
Mouse-7	Gdf11 tm2b/+	Female	2	149	210500	10	40	13.84	430.636	8.42002e+06
Mouse-7	Gdf11 tm2b/+	Female	3	150	207324	10	40	15.62	384.123	8.29295e+06
Mouse-8	Gdf11 tm2b/+	Female	1	109	181898	10	40	18.1	240.884	7.27593e+06	5.51766e+08		18453.5	3.34445e-05	452
Mouse-8	Gdf11 tm2b/+	Female	2	196	239792	10	40	17.01	460.905	9.59169e+06
Mouse-8	Gdf11 tm2b/+	Female	3	147	268017	10	40	26.62	220.887	1.07207e+07
													Figure 4B - left	Figure 4B - right	Figure S4B
												Statistics
												Test	Welsch's t-test	Welsch's t-test	Welsch's t-test
												p-value	0.3053	0.8503	0.2363

## Sheet: Gfap+
Animal ID	Genotype	Sex	Image #	Gfap+	Area (um^2)	ssf/asf	Thickness (um)	Effective thickness (um)	Total Gfap/section	Volume of DG/setion	Total volume of DG		Total Estimated population	Density (Total est. pop./Total Vol.)	Total Stain
Mouse-1	Wild-type	Male	1	54	197847	6	40	27.84	77.5862	7.91389e+06	5.15243e+08		4856.32	9.4253e-06	258
Mouse-1	Wild-type	Male	2	54	196197	6	40	30.32	71.2401	7.84787e+06
Mouse-1	Wild-type	Male	3	25	201184	6	40	28.59	34.9773	8.04735e+06
Mouse-1	Wild-type	Male	4	57	165239	6	40	21.62	105.458	6.60955e+06
Mouse-1	Wild-type	Male	5	34	158883	6	40	25.34	53.6701	6.35531e+06
Mouse-1	Wild-type	Male	6	34	154074	6	40	22.02	61.762	6.16296e+06
Mouse-2	Wild-type	Female	1	37	201814	6	40	20.15	73.4491	8.07257e+06	5.69909e+08		3537.24	6.20667e-06	204
Mouse-2	Wild-type	Female	2	18	215114	6	40	30.34	23.731	8.60456e+06
Mouse-2	Wild-type	Female	3	10	203542	6	40	28.8	13.8889	8.14167e+06
Mouse-2	Wild-type	Female	4	70	195245	6	40	30.63	91.4136	7.80982e+06
Mouse-2	Wild-type	Female	5	55	188652	6	40	30.71	71.6379	7.54609e+06
Mouse-2	Wild-type	Female	6	14	182942	6	40	27.12	20.649	7.31766e+06
Mouse-3	Wild-type	Female	1	60	240246	6	40	30.09	79.7607	9.60986e+06	5.46615e+08		5161.98	9.44354e-06	305
Mouse-3	Wild-type	Female	2	39	147334	6	40	28.8	54.1667	5.89338e+06
Mouse-3	Wild-type	Female	3	58	182555	6	40	29.9	77.592	7.3022e+06
Mouse-3	Wild-type	Female	4	65	200236	6	40	27.2	95.5882	8.00944e+06
Mouse-3	Wild-type	Female	5	56	216749	6	40	25.46	87.9811	8.66994e+06
Mouse-3	Wild-type	Female	6	27	151661	6	40	30.79	35.0763	6.06644e+06
Mouse-4	Gdf11 tm2b/+	Male	1	48	201302	6	40	29.33	65.462	8.05207e+06	5.03965e+08		4682.8	9.29191e-06	256
Mouse-4	Gdf11 tm2b/+	Male	2	65	204401	6	40	30.34	85.6955	8.17604e+06
Mouse-4	Gdf11 tm2b/+	Male	3	32	207985	6	40	28.57	44.8022	8.3194e+06
Mouse-4	Gdf11 tm2b/+	Male	4	43	150612	6	40	29.21	58.8839	6.02448e+06
Mouse-4	Gdf11 tm2b/+	Male	5	20	132851	6	40	26.01	30.7574	5314022
Mouse-4	Gdf11 tm2b/+	Male	6	48	152777	6	40	18.35	104.632	6111090
Mouse-5	Gdf11 tm2b/+	Male	1	48	185025	6	40	24.68	77.7958	7.40101e+06	5.02418e+08		4039.7	8.04052e-06	201
Mouse-5	Gdf11 tm2b/+	Male	2	31	205919	6	40	30.28	40.9511	8.23677e+06
Mouse-5	Gdf11 tm2b/+	Male	3	10	205839	6	40	20.17	19.8314	8.23354e+06
Mouse-5	Gdf11 tm2b/+	Male	4	41	149430	6	40	20	82	5.9772e+06
Mouse-5	Gdf11 tm2b/+	Male	5	33	147200	6	40	25.38	52.0095	5.888e+06
Mouse-5	Gdf11 tm2b/+	Male	6	38	153291	6	40	23.73	64.0539	6.13163e+06
Mouse-6	Gdf11 tm2b/+	Male	1	17	174198	6	40	22.18	30.6583	6.9679e+06	4.50304e+08		2682.55	5.9572e-06	134
Mouse-6	Gdf11 tm2b/+	Male	2	28	176476	6	40	26.61	42.0894	7.05903e+06
Mouse-6	Gdf11 tm2b/+	Male	3	12	154787	6	40	27.1	17.7122	6.19148e+06
Mouse-6	Gdf11 tm2b/+	Male	4	23	143789	6	40	22.96	40.0697	5.75156e+06
Mouse-6	Gdf11 tm2b/+	Male	5	25	142432	6	40	24.91	40.1445	5.69729e+06
Mouse-6	Gdf11 tm2b/+	Male	6	29	146451	6	40	21.94	52.8715	5.85803e+06
Mouse-7	Gdf11 tm2b/+	Female	1	56	221417	6	40	19.02	117.771	8.85668e+06	5.4861e+08		6760.82	1.23235e-05	359
Mouse-7	Gdf11 tm2b/+	Female	2	62	197115	6	40	26.21	94.6204	7.88461e+06
Mouse-7	Gdf11 tm2b/+	Female	3	68	179524	6	40	29.45	92.3599	7.18095e+06
Mouse-7	Gdf11 tm2b/+	Female	4	73	177525	6	40	23.86	122.381	7.10098e+06
Mouse-7	Gdf11 tm2b/+	Female	5	58	179316	6	40	29.83	77.7741	7.17265e+06
Mouse-7	Gdf11 tm2b/+	Female	6	42	188041	6	40	28.72	58.4958	7.52165e+06
Mouse-8	Gdf11 tm2b/+	Female	1	12	149377	6	40	25.81	18.5974	5.97509e+06	5.10913e+08		4237.72	8.29441e-06	266
Mouse-8	Gdf11 tm2b/+	Female	2	36	145735	6	40	27.69	52.0043	5.82939e+06
Mouse-8	Gdf11 tm2b/+	Female	3	71	196332	6	40	31.99	88.7777	7.8533e+06
Mouse-8	Gdf11 tm2b/+	Female	4	78	216276	6	40	31.41	99.3314	8.65103e+06
Mouse-8	Gdf11 tm2b/+	Female	5	27	193241	6	40	33.06	32.6679	7.72964e+06
Mouse-8	Gdf11 tm2b/+	Female	6	42	163441	6	40	27.2	61.7647	6.53764e+06
													Figure 4C - left	Figure 4C - right	Figure S4C
												Statistics
												Test	Welsch's t-test	Welsch's t-test	Welsch's t-test
												p-value	0.9651	0.7882	0.8012

## Sheet: Sox2+Gfap+
Animal ID	Genotype	Sex	Image #	Sox2/Gfap+	Area of DG (um^2)	ssf/asf	Thickness (um)	Effective Thickness (um)	Total Sox2/section	Volume of DG/setion	Total volume		Total Estimated population	Density (Total est. pop./Total Vol.)	Total
Mouse-1	Wild-type	Male	1	42	177783	10	40	17.15	97.9592	7.11134e+06	4.52481e+08		8185.93	1.80912e-05	112
Mouse-1	Wild-type	Male	2	43	180958	10	40	16.01	107.433	7.23834e+06
Mouse-1	Wild-type	Male	3	27	206859	10	40	9.22	203.905	8.27436e+06
Mouse-2	Wild-type	Female	1	67	199383	10	40	19.14	140.021	7.97531e+06	5.74325e+08		9828.13	1.71125e-05	196
Mouse-2	Wild-type	Female	2	60	240135	10	40	13.49	177.91	9.60539e+06
Mouse-2	Wild-type	Female	3	69	278389	10	40	15.91	173.476	1.11356e+07
Mouse-3	Wild-type	Female	1	46	155506	10	40	11.48	160.279	6.22023e+06	4.8694e+08		10767.3	2.21123e-05	208
Mouse-3	Wild-type	Female	2	75	209644	10	40	17.73	169.205	8.38576e+06
Mouse-3	Wild-type	Female	3	87	243525	10	40	16.66	208.884	9.741e+06
Mouse-4	Gdf11 tm2b/+	Male	1	32	160434	10	40	13.45	95.1673	6.41736e+06	4.62424e+08		9789.59	2.11701e-05	170
Mouse-4	Gdf11 tm2b/+	Male	2	77	202935	10	40	11.52	267.361	8.1174e+06
Mouse-4	Gdf11 tm2b/+	Male	3	61	214661	10	40	19.22	126.951	8.58645e+06
Mouse-5	Gdf11 tm2b/+	Male	1	45	162460	10	40	15.56	115.681	6.49838e+06	463564892		10411.9	2.24604e-05	208
Mouse-5	Gdf11 tm2b/+	Male	2	77	204593	10	40	15.62	197.183	8.18371e+06
Mouse-5	Gdf11 tm2b/+	Male	3	86	212404	10	40	16.56	207.729	8.49615e+06
Mouse-6	Gdf11 tm2b/+	Male	1	9	128959	10	40	12.3	29.2683	5.15834e+06	403138148		5853.27	1.45193e-05	87
Mouse-6	Gdf11 tm2b/+	Male	2	31	151014	10	40	14.14	87.6945	6.04055e+06
Mouse-6	Gdf11 tm2b/+	Male	3	47	223950	10	40	10.7	175.701	8.95802e+06
Mouse-7	Gdf11 tm2b/+	Female	1	37	174229	10	40	13.14	112.633	6.96915e+06	4.73642e+08		10865.2	2.29397e-05	195
Mouse-7	Gdf11 tm2b/+	Female	2	79	210500	10	40	13.84	228.324	8.42002e+06
Mouse-7	Gdf11 tm2b/+	Female	3	79	207324	10	40	15.62	202.305	8.29295e+06
Mouse-8	Gdf11 tm2b/+	Female	1	44	181898	10	40	18.1	97.2376	7.27593e+06	5.51766e+08		6769.61	1.2269e-05	165
Mouse-8	Gdf11 tm2b/+	Female	2	70	239792	10	40	17.01	164.609	9.59169e+06
Mouse-8	Gdf11 tm2b/+	Female	3	51	268017	10	40	26.62	76.6341	1.07207e+07
													Figure 4D - left	Figure 4D - right	Figure S4D
												Statistics
												Test	Welsch's t-test	Welsch's t-test	Welsch's t-test
												p-value	0.524	0.8769	0.8586

## Sheet: Dentate Volume
Animal ID	Genotype	Sex	Dentate Volume Replicate 1	Dentate Volume Replicate 2		Average Volume Area
Mouse-1	Wild-type	Male	5.15243e+08	4.52481e+08		4.83862e+08
Mouse-2	Wild-type	Female	5.69909e+08	5.74325e+08		5.72117e+08
Mouse-3	Wild-type	Female	5.46615e+08	4.8694e+08		5.16777e+08
Mouse-4	Gdf11 tm2b/+	Male	5.03965e+08	4.62424e+08		4.83195e+08
Mouse-5	Gdf11 tm2b/+	Male	5.02418e+08	463564892		4.82991e+08
Mouse-6	Gdf11 tm2b/+	Male	4.50304e+08	403138148		4.26721e+08
Mouse-7	Gdf11 tm2b/+	Female	5.4861e+08	4.73642e+08		5.11126e+08
Mouse-8	Gdf11 tm2b/+	Female	5.10913e+08	5.51766e+08		5.3134e+08
						Figure S4E
					Statistics
					Test	Welsch's t-test
					p-value	0.3011
